# Supplementary material for: The Complete Mitogenome of Pyrrhocoris tibialis (Hemiptera: Pyrrhocoridae) and Phylogenetic Implications
Source: MDPI journal article supplement (doi:10.3390/genes10100820), 2019-10-18
Supplement: s1 [file s1]

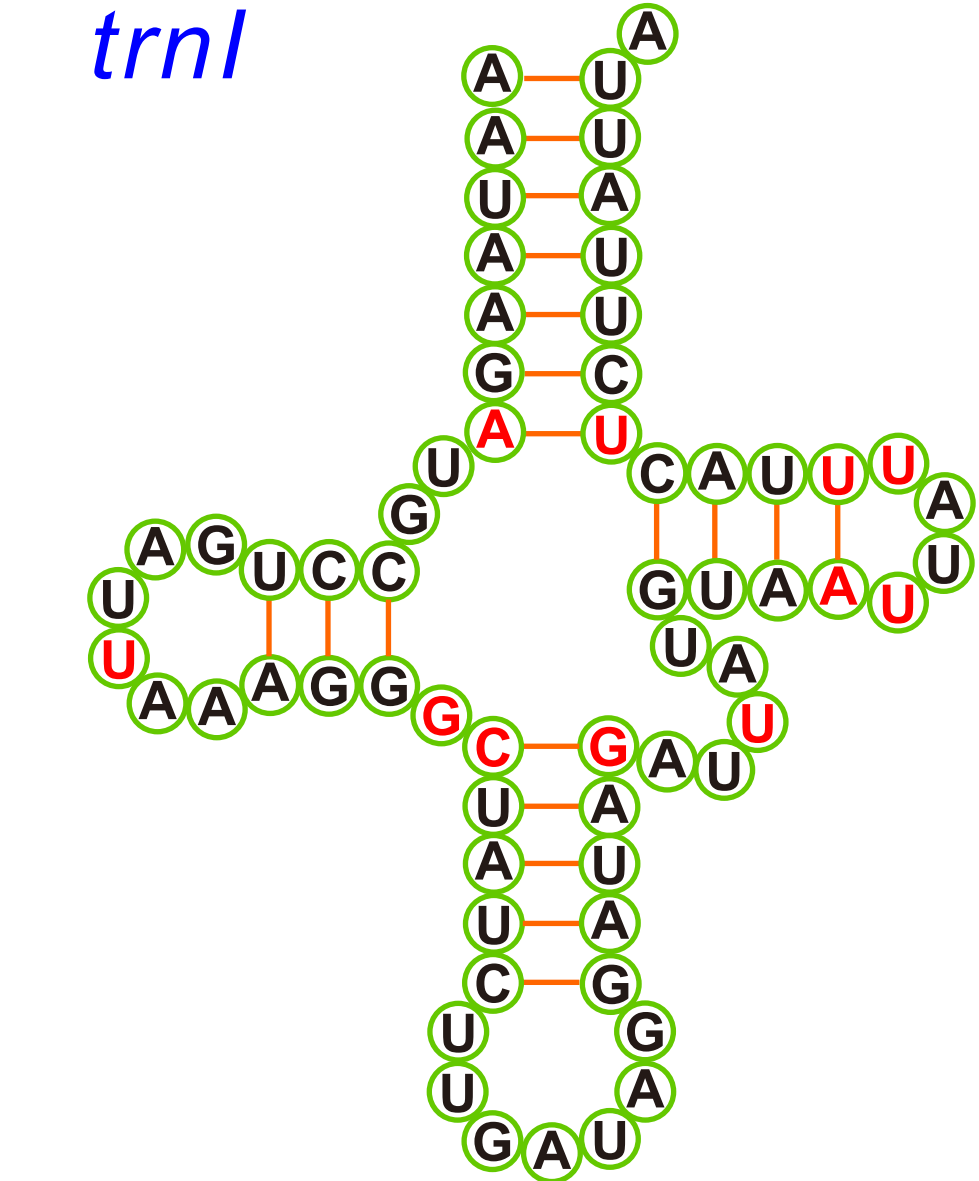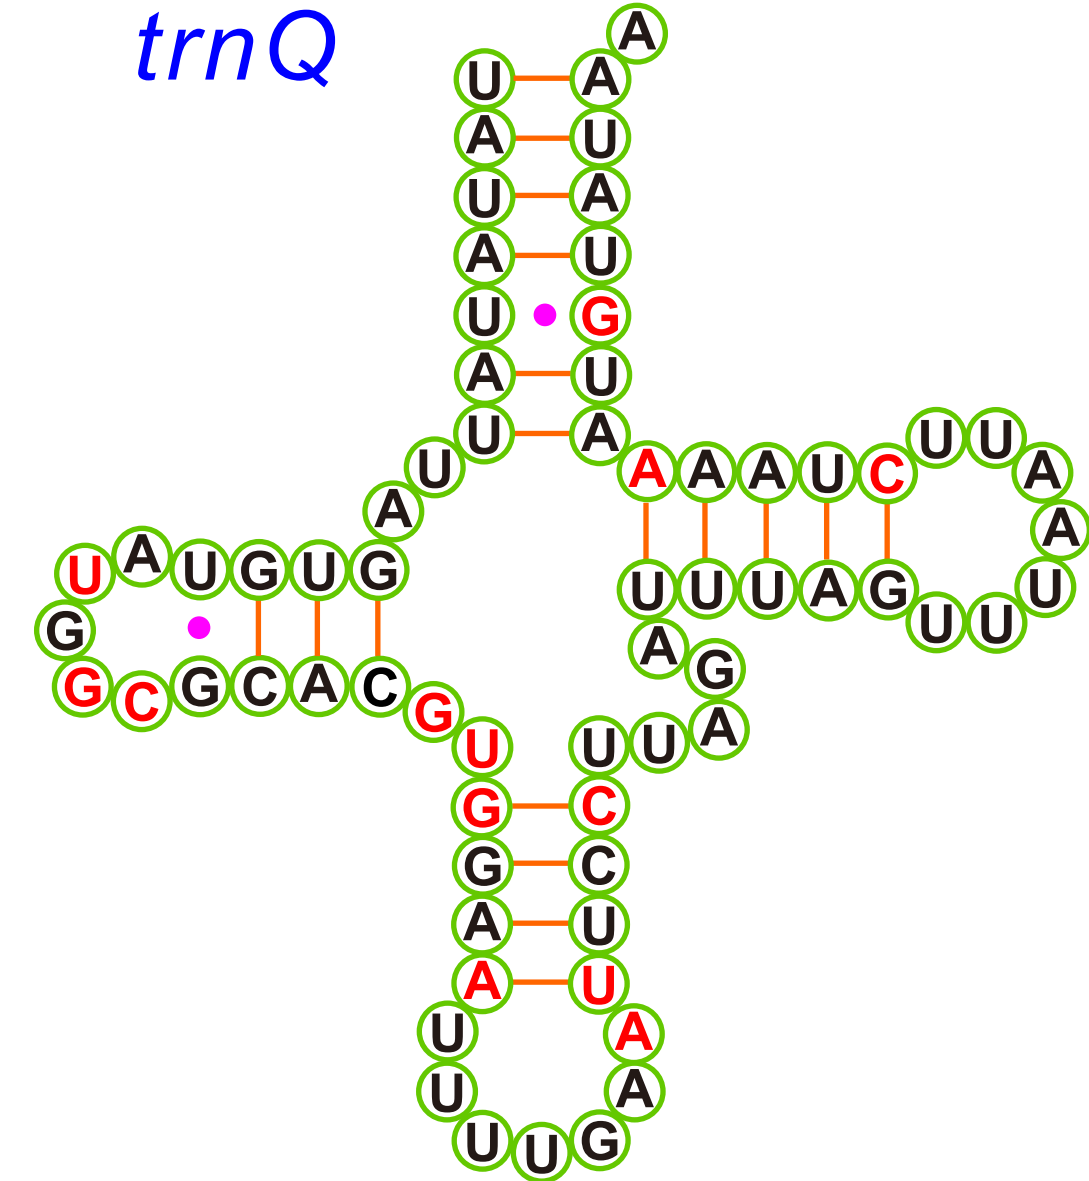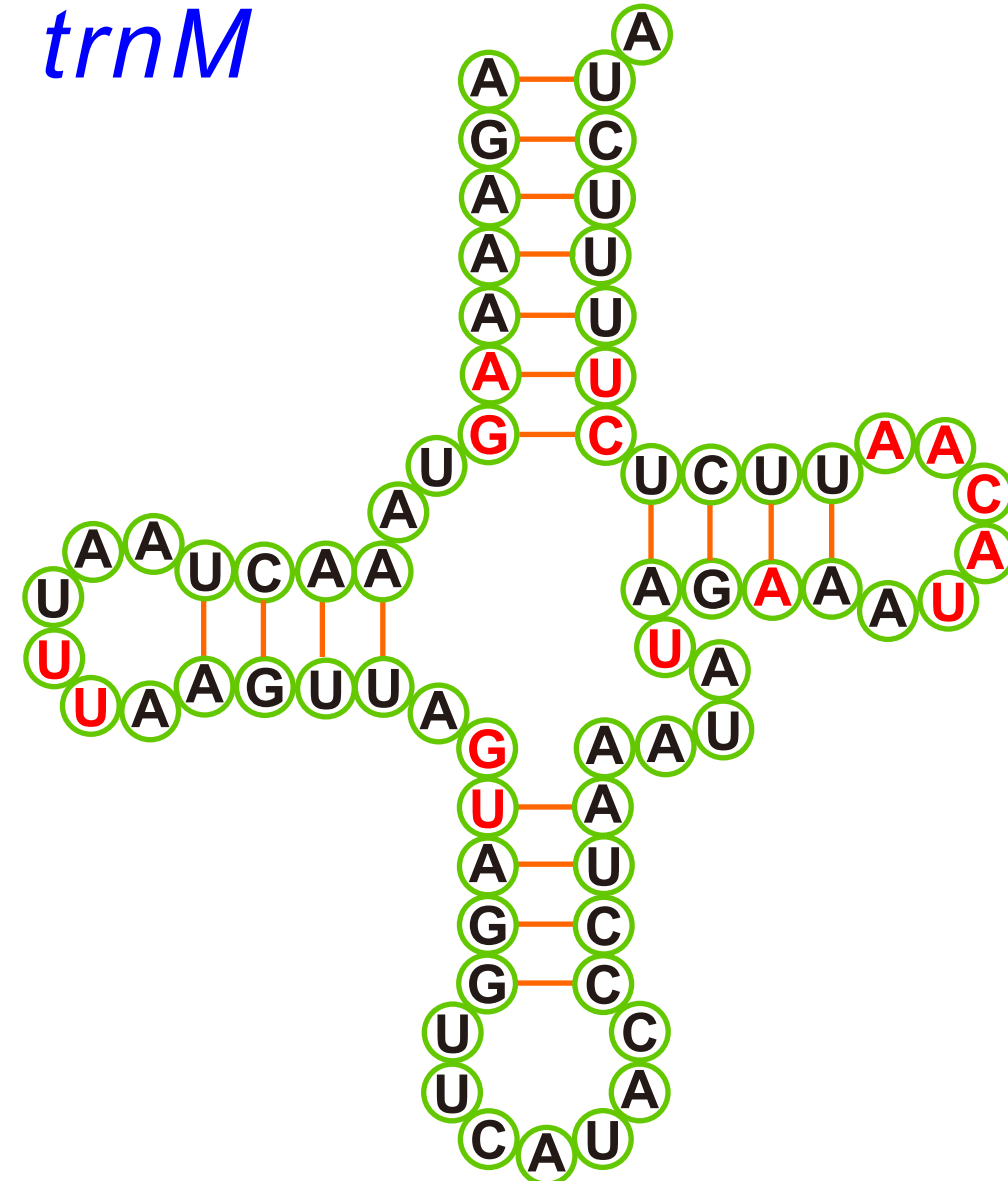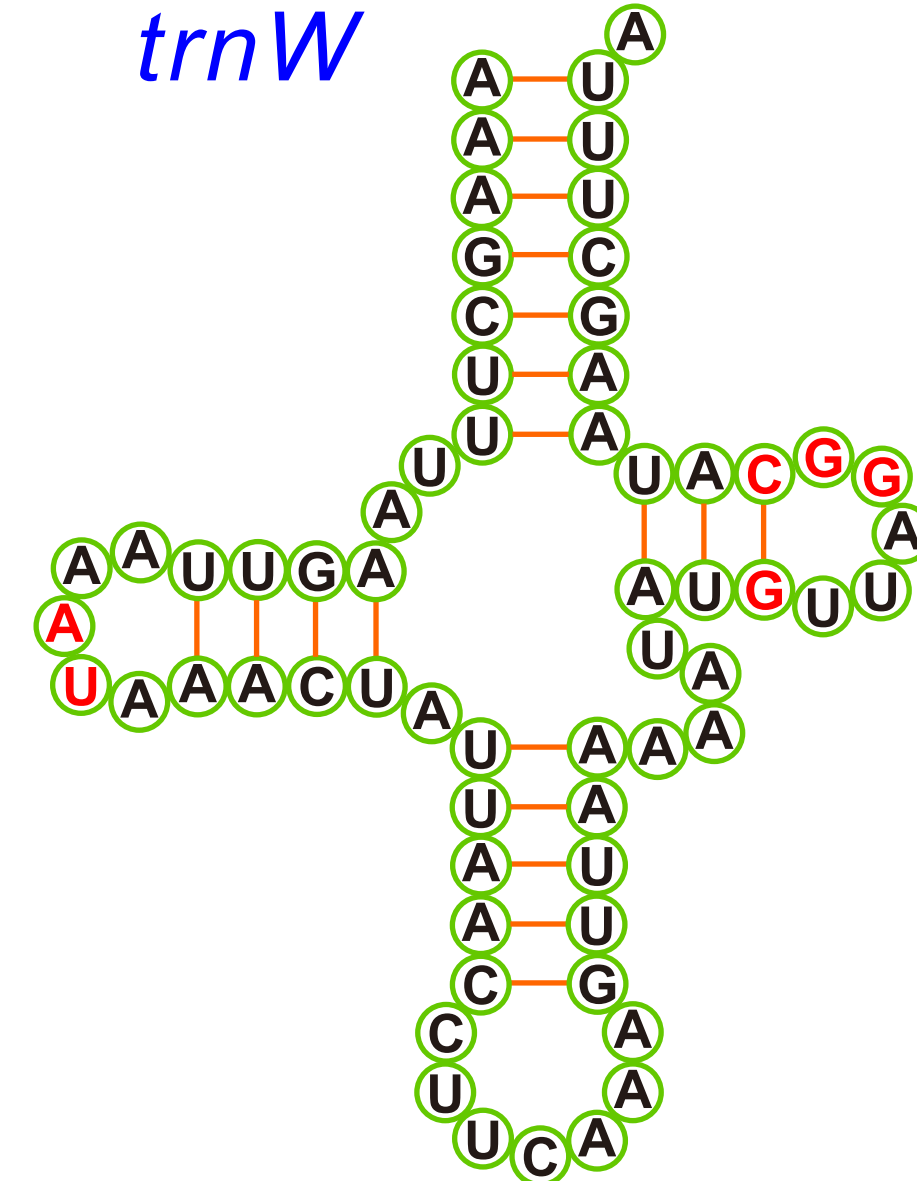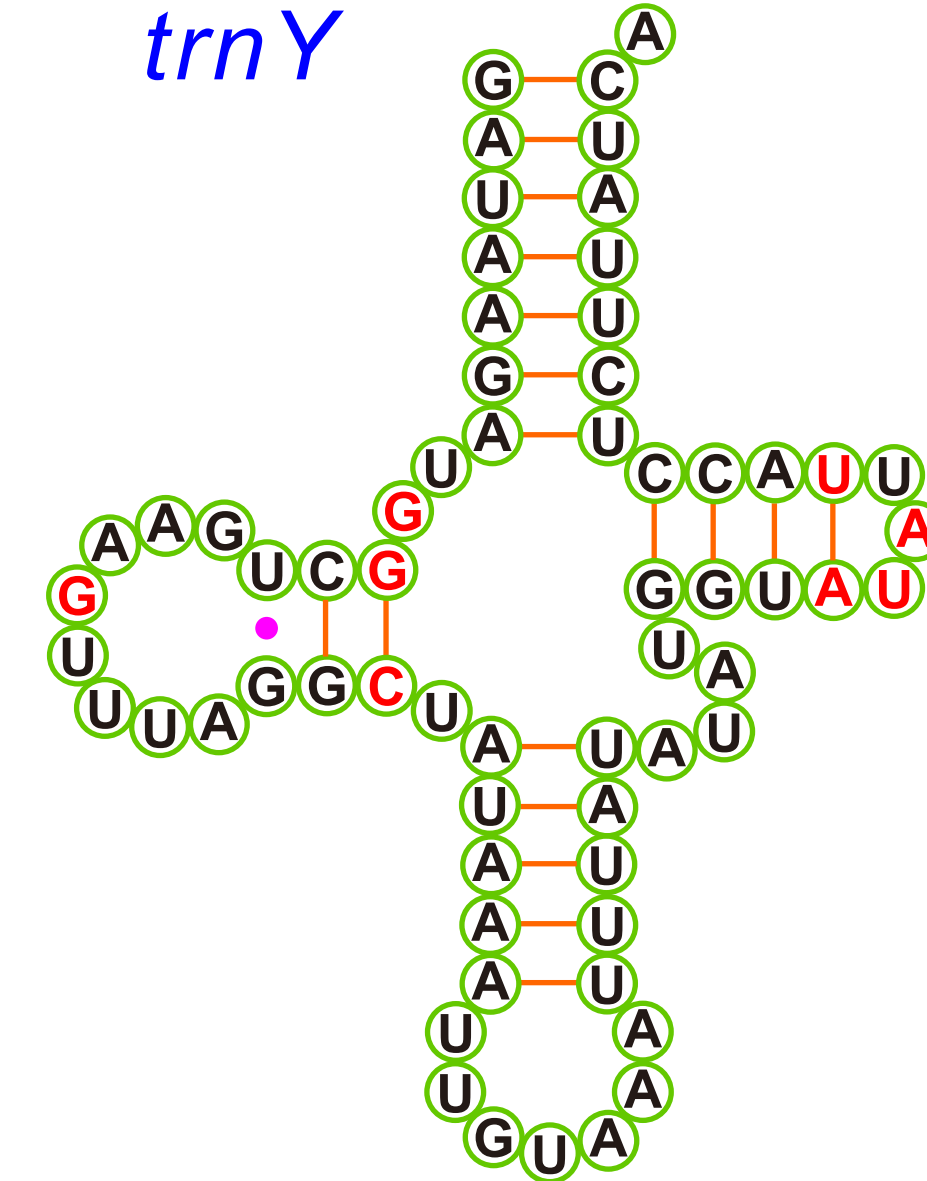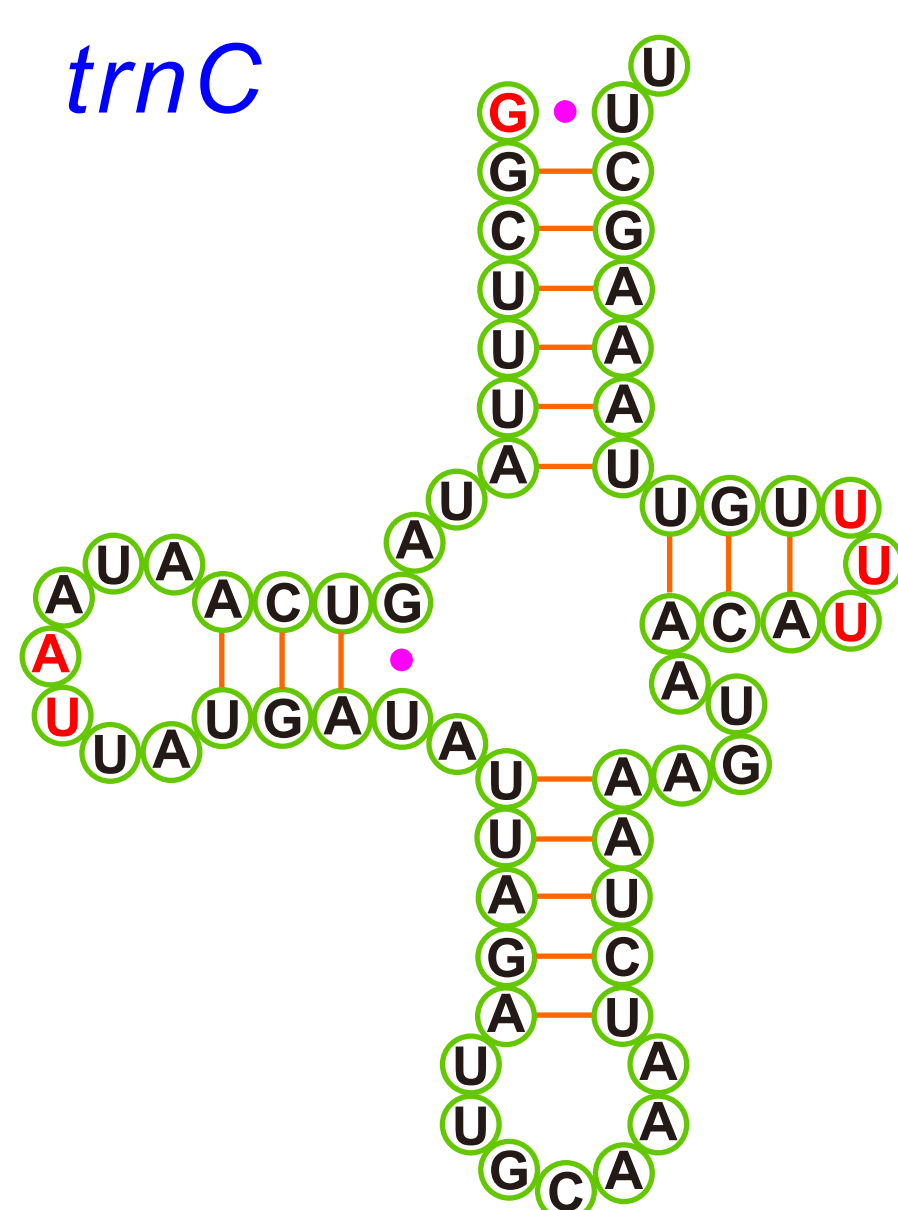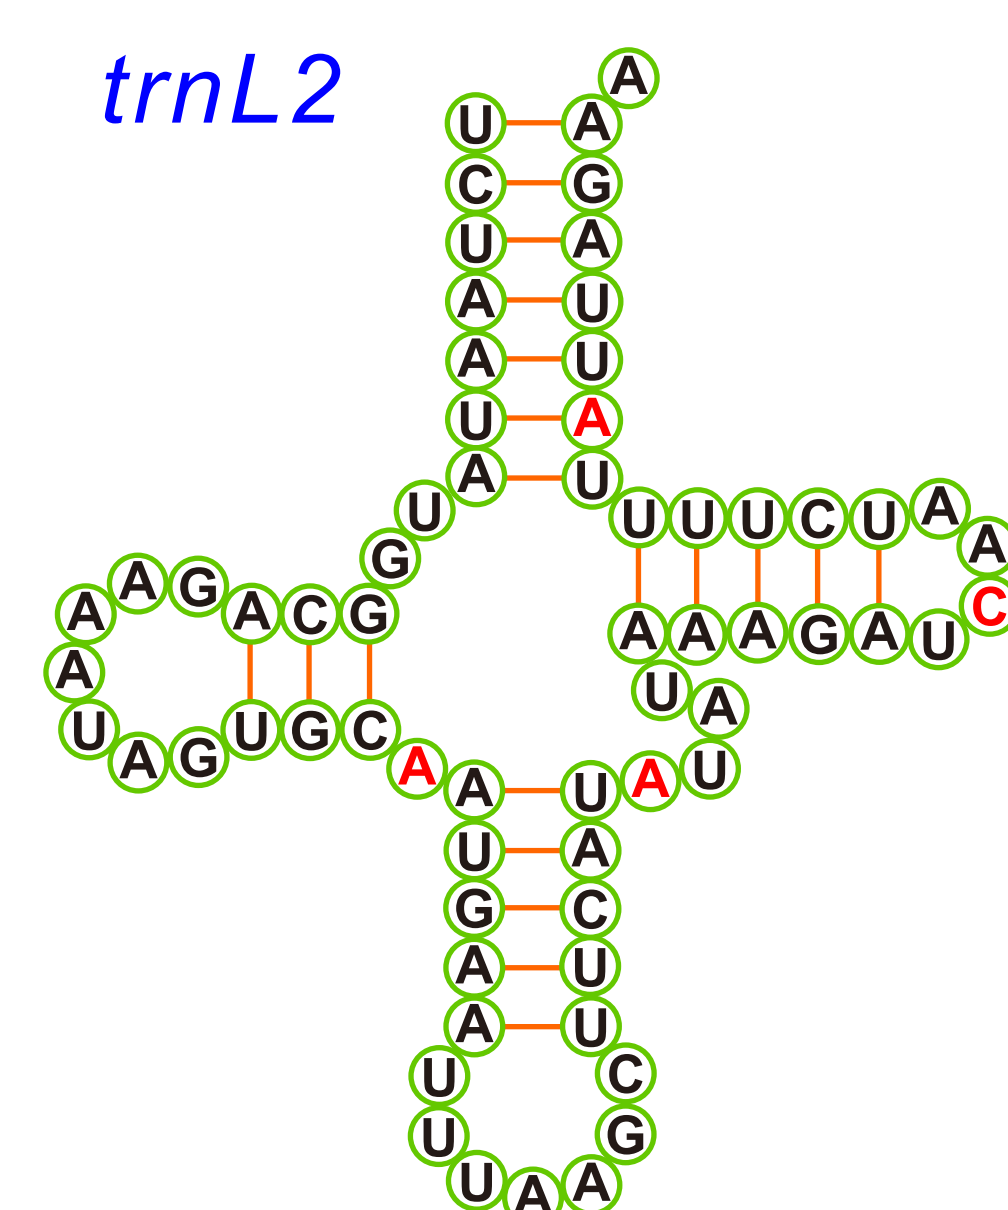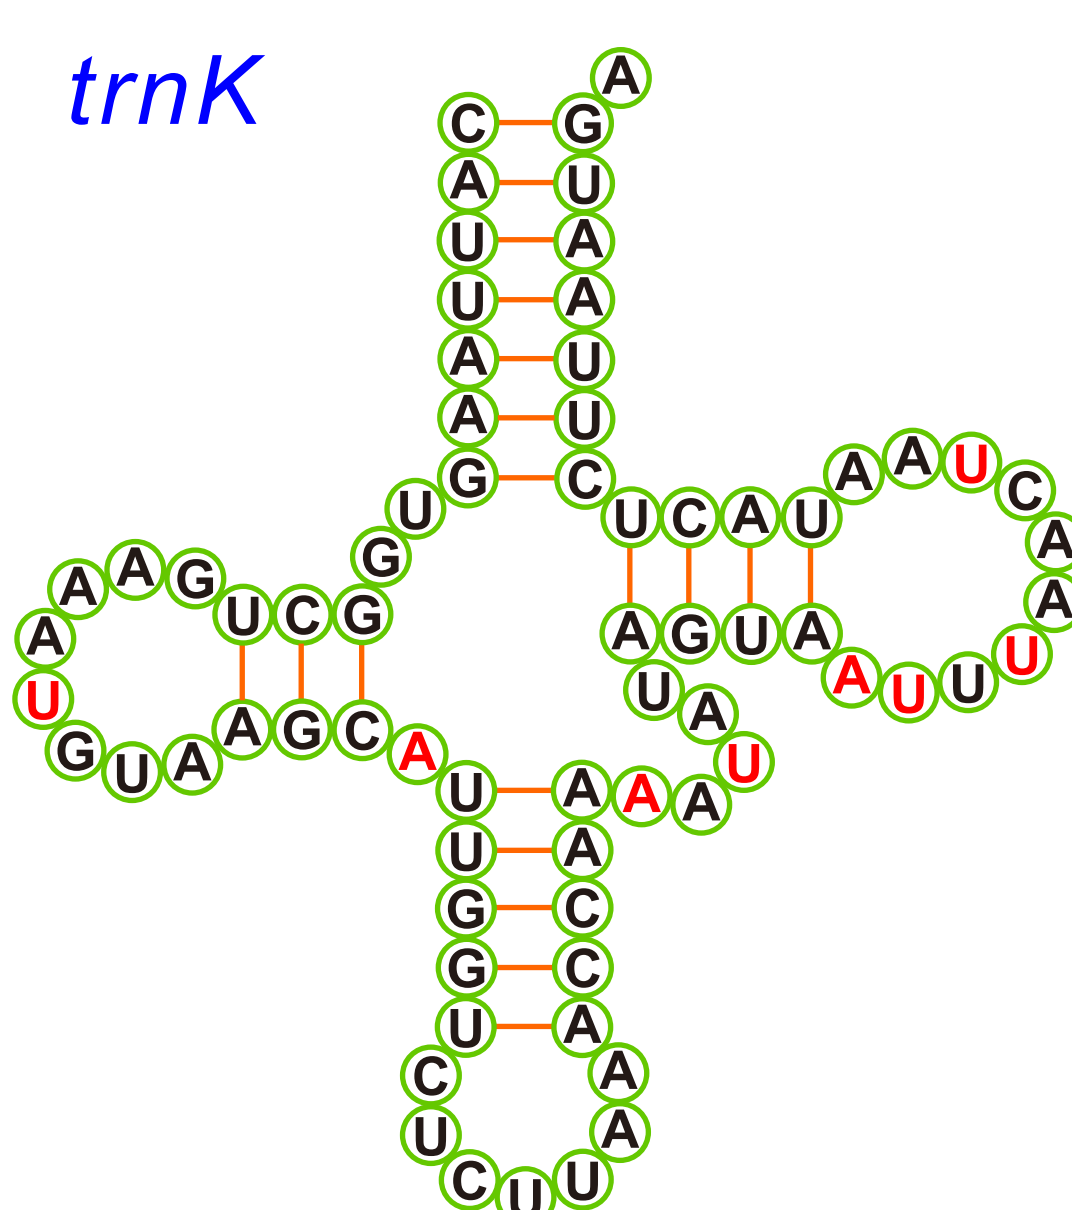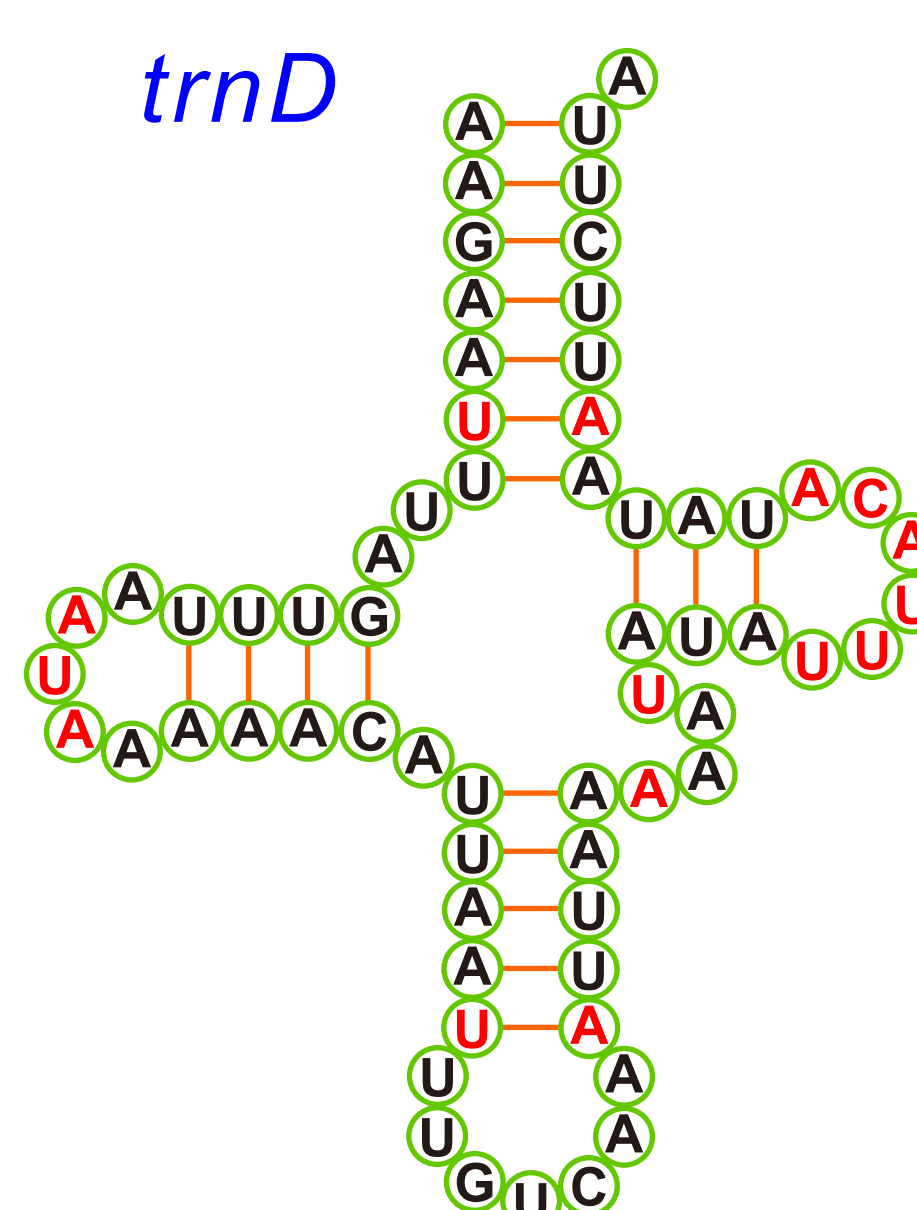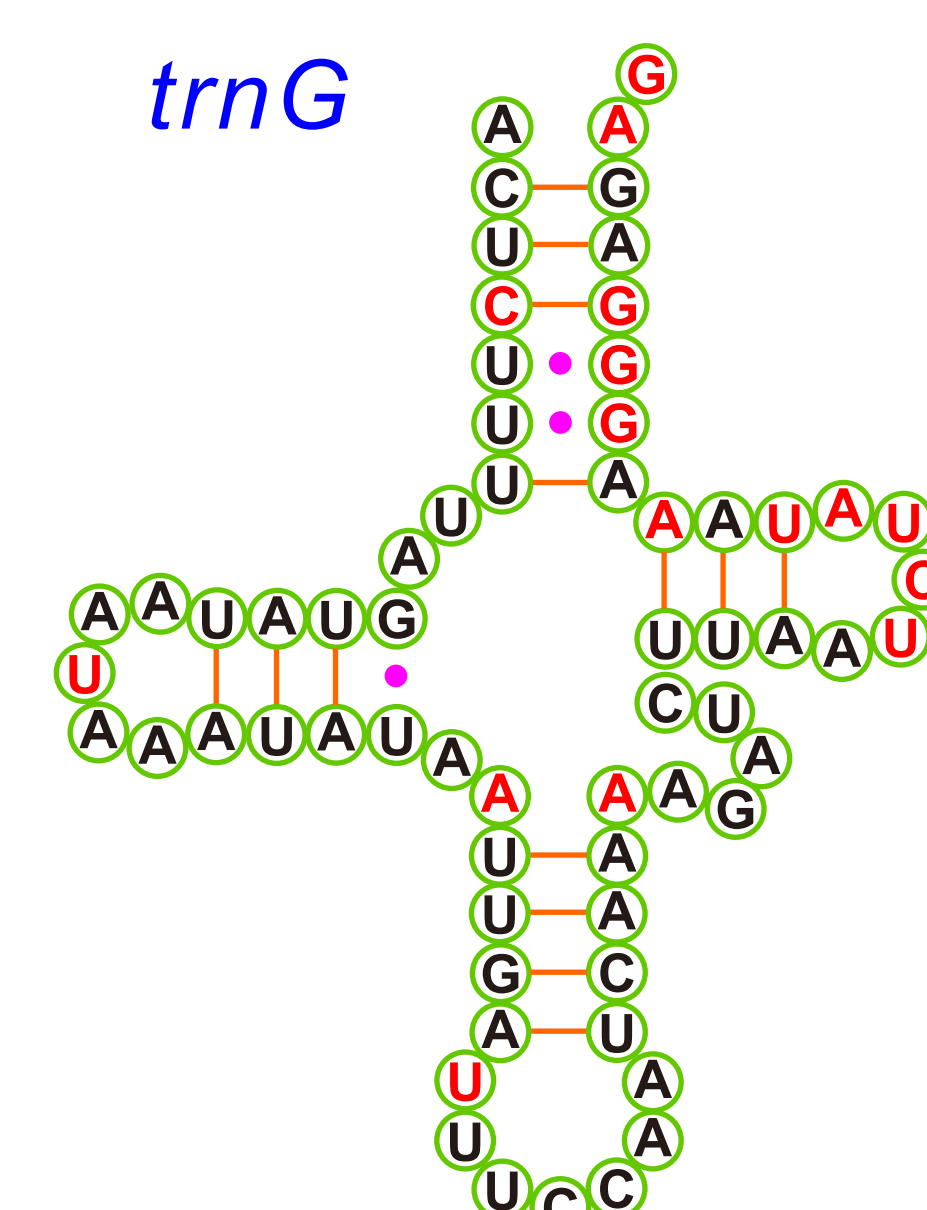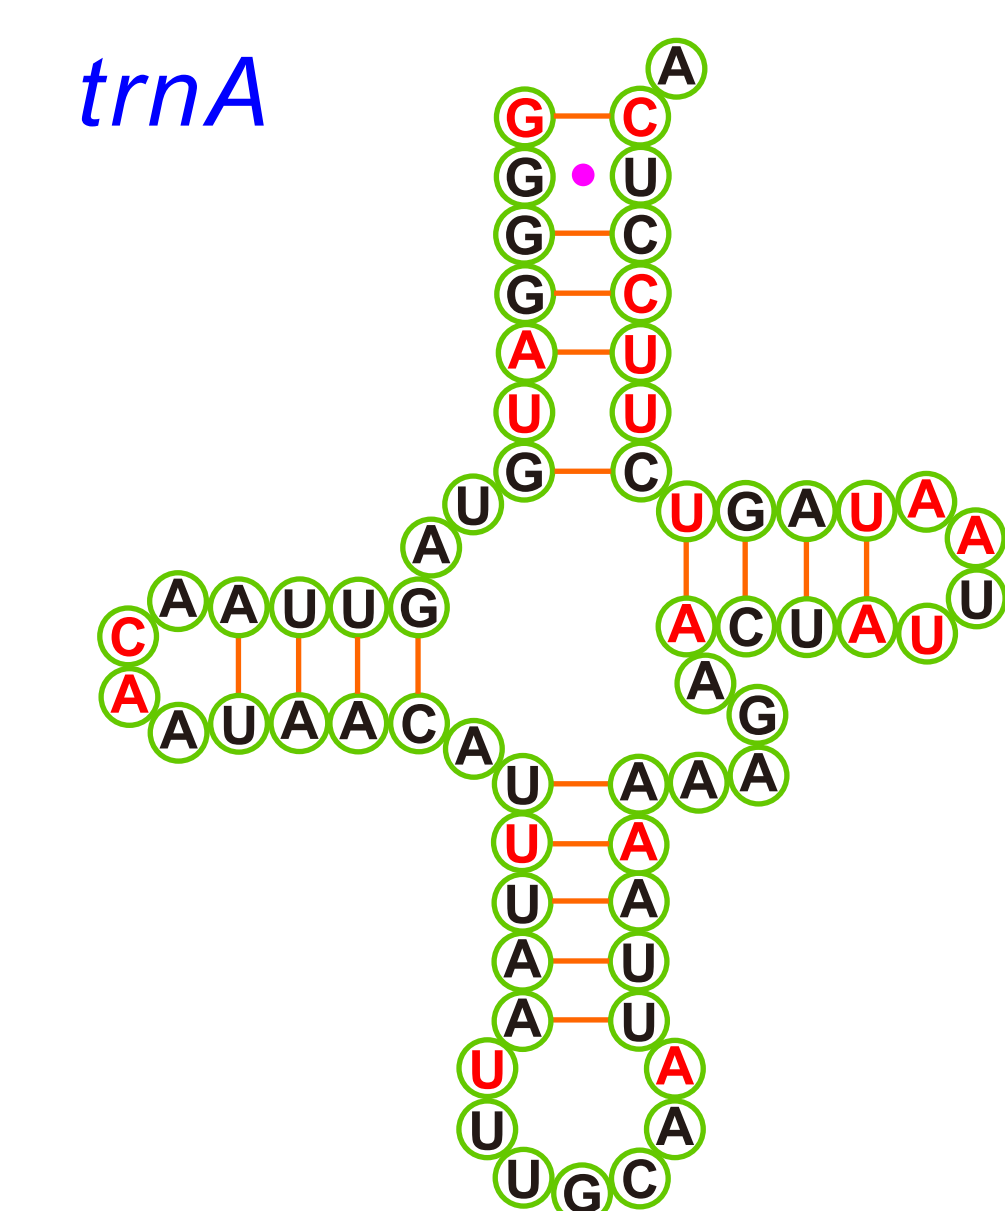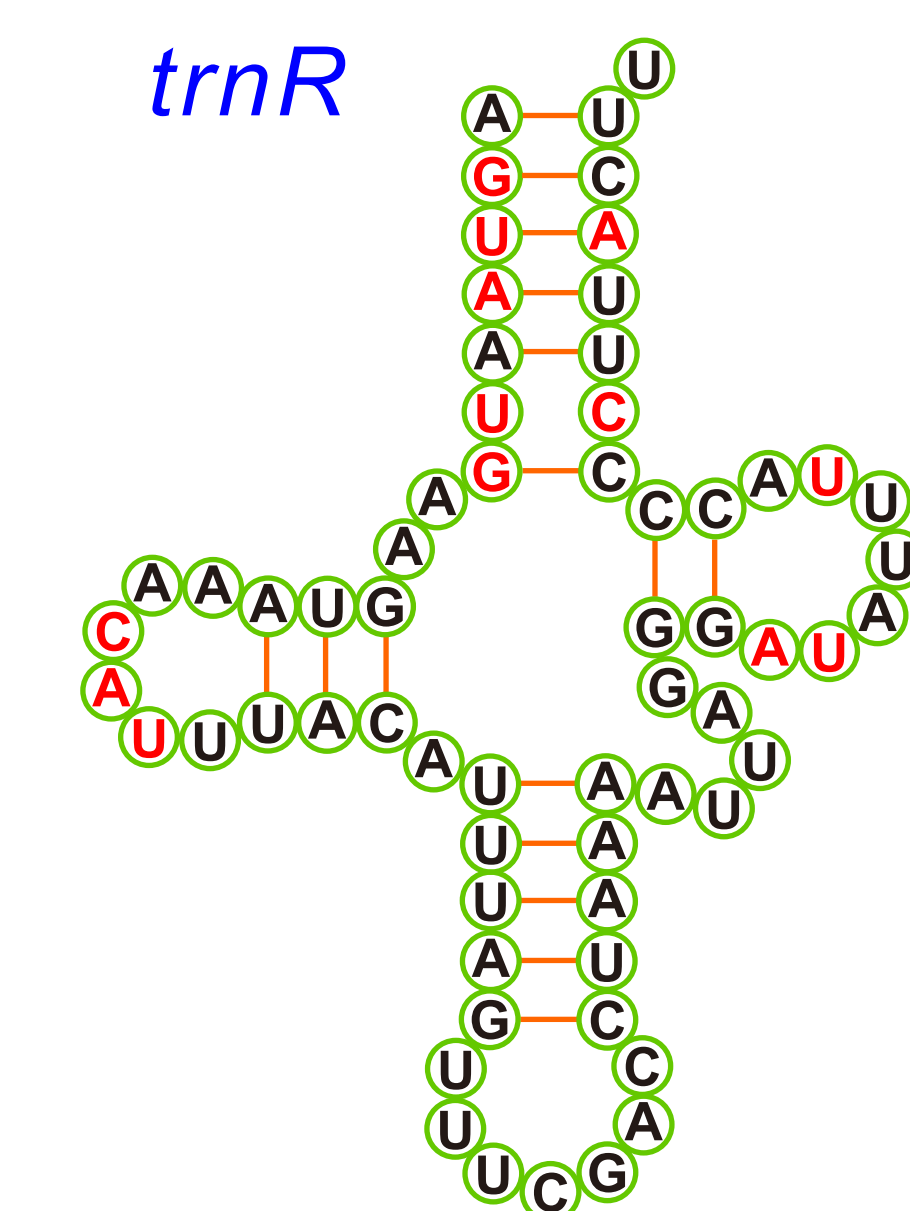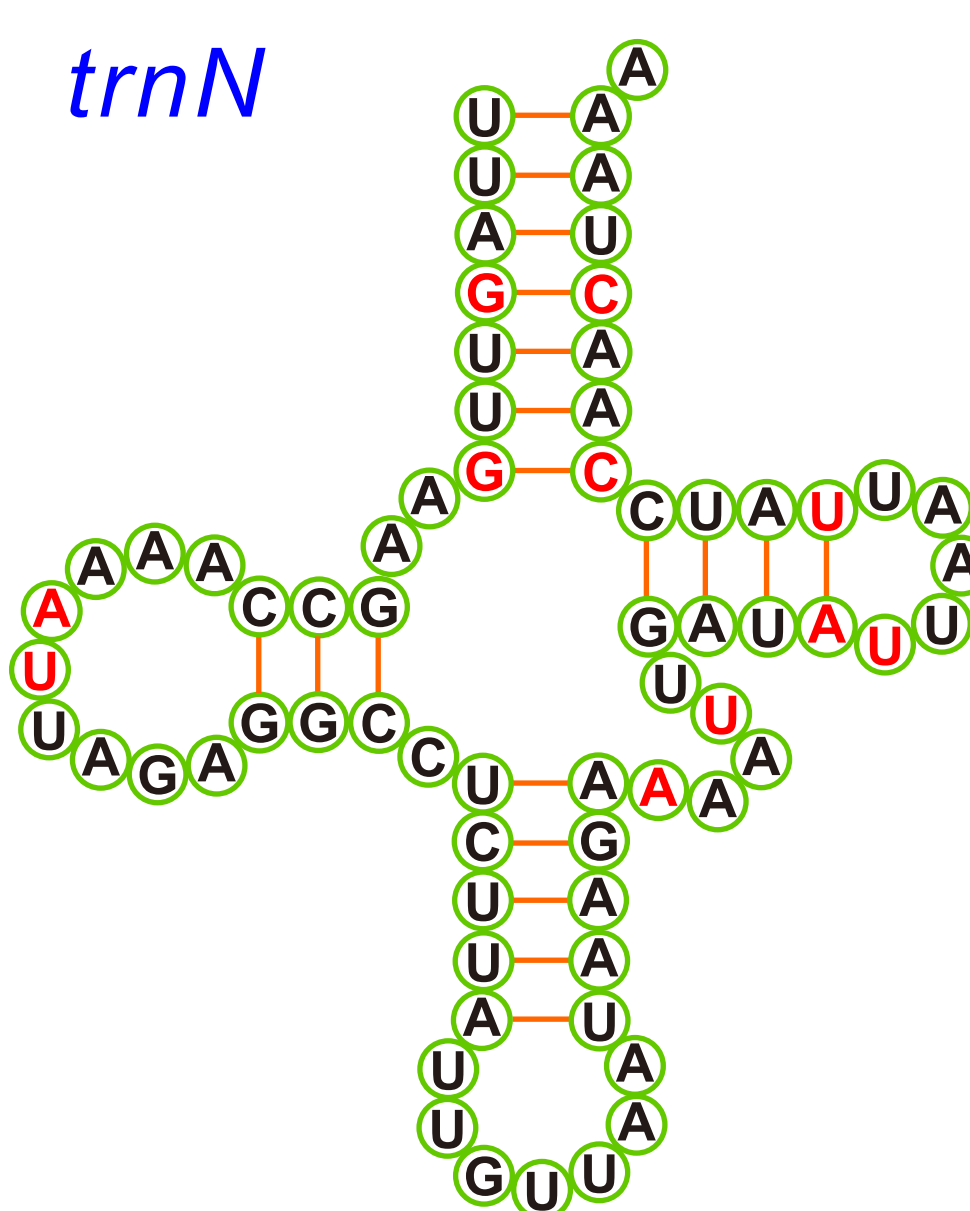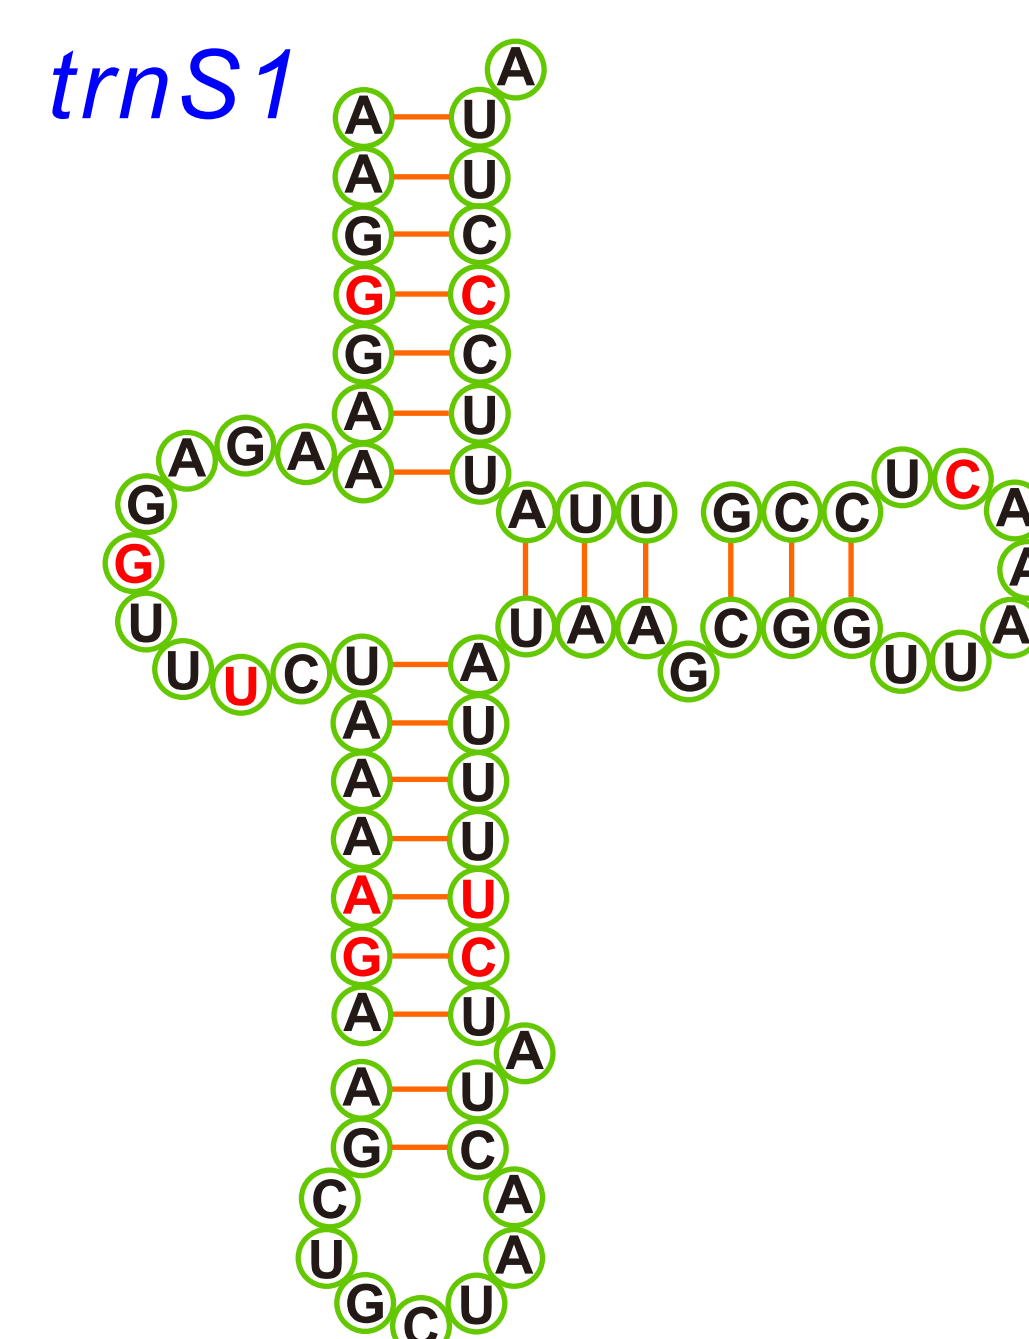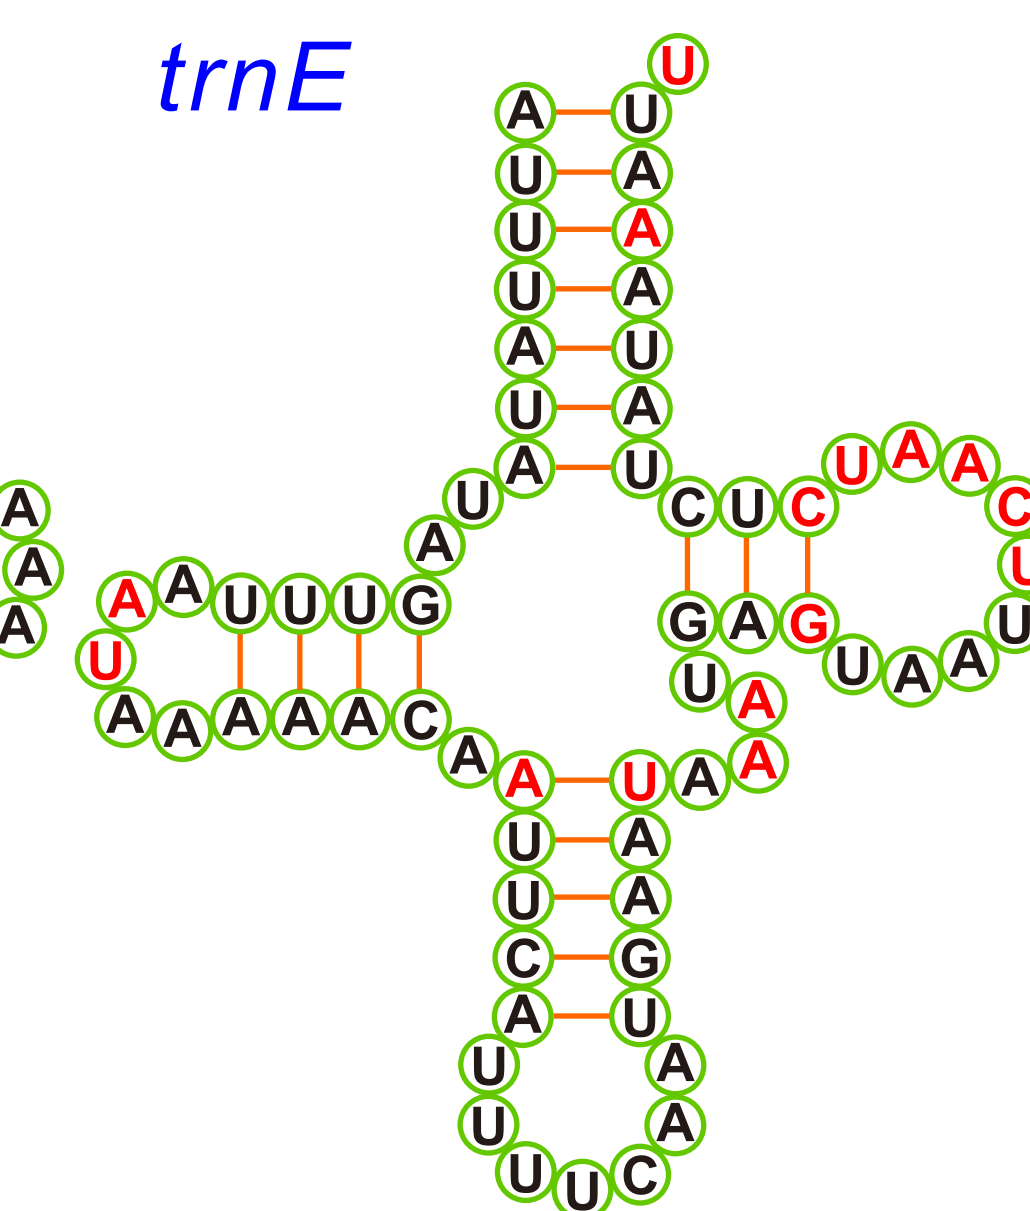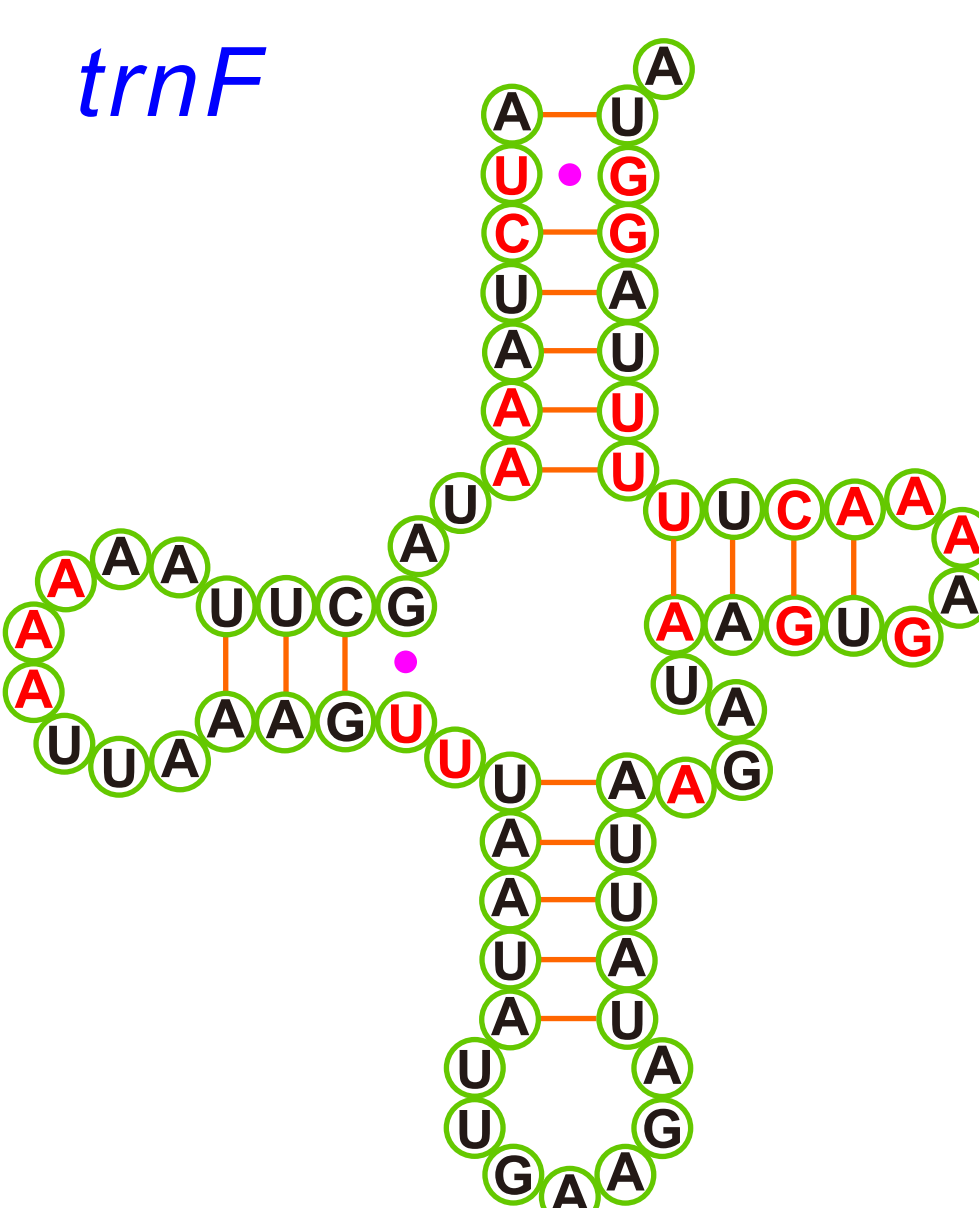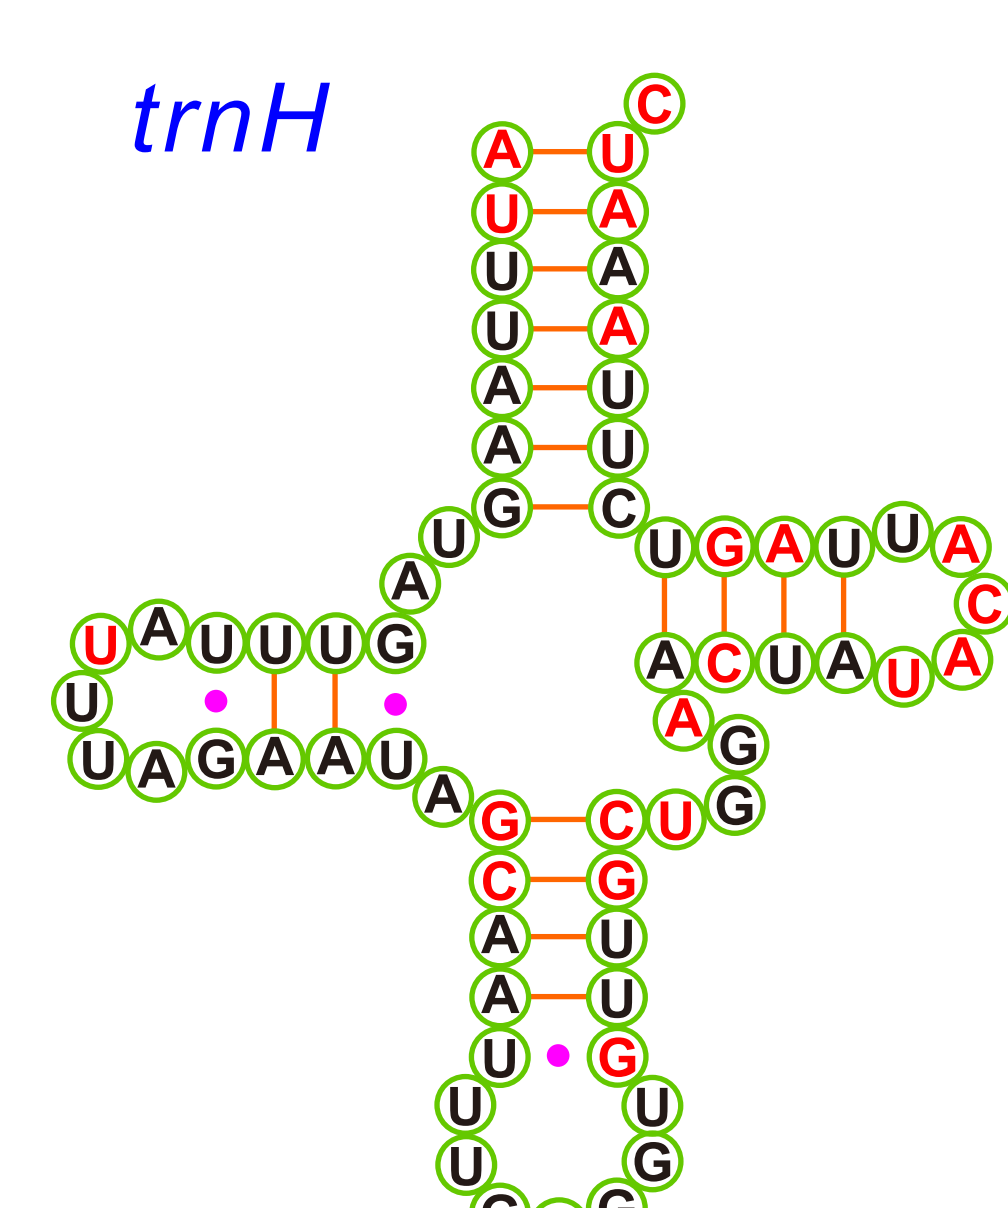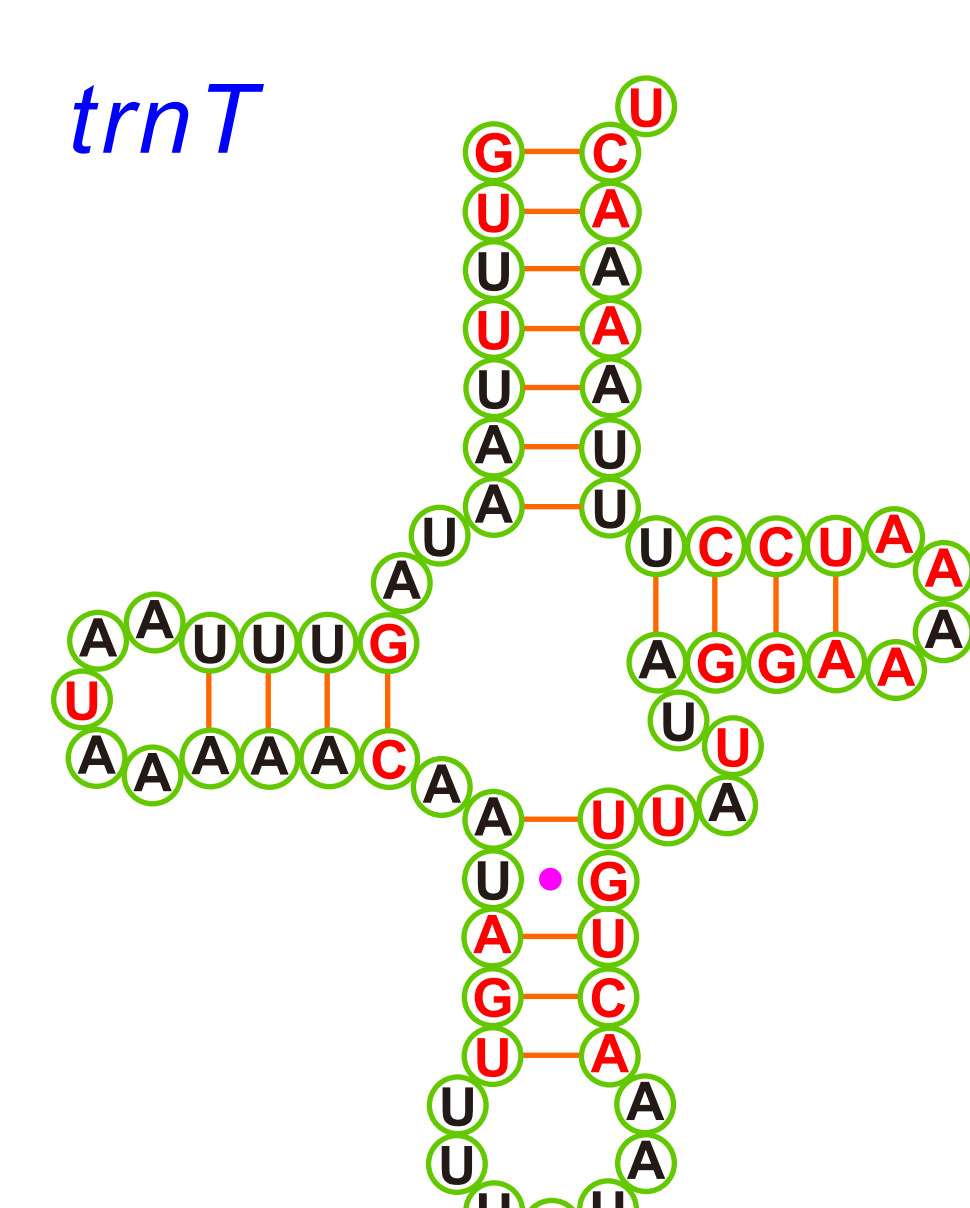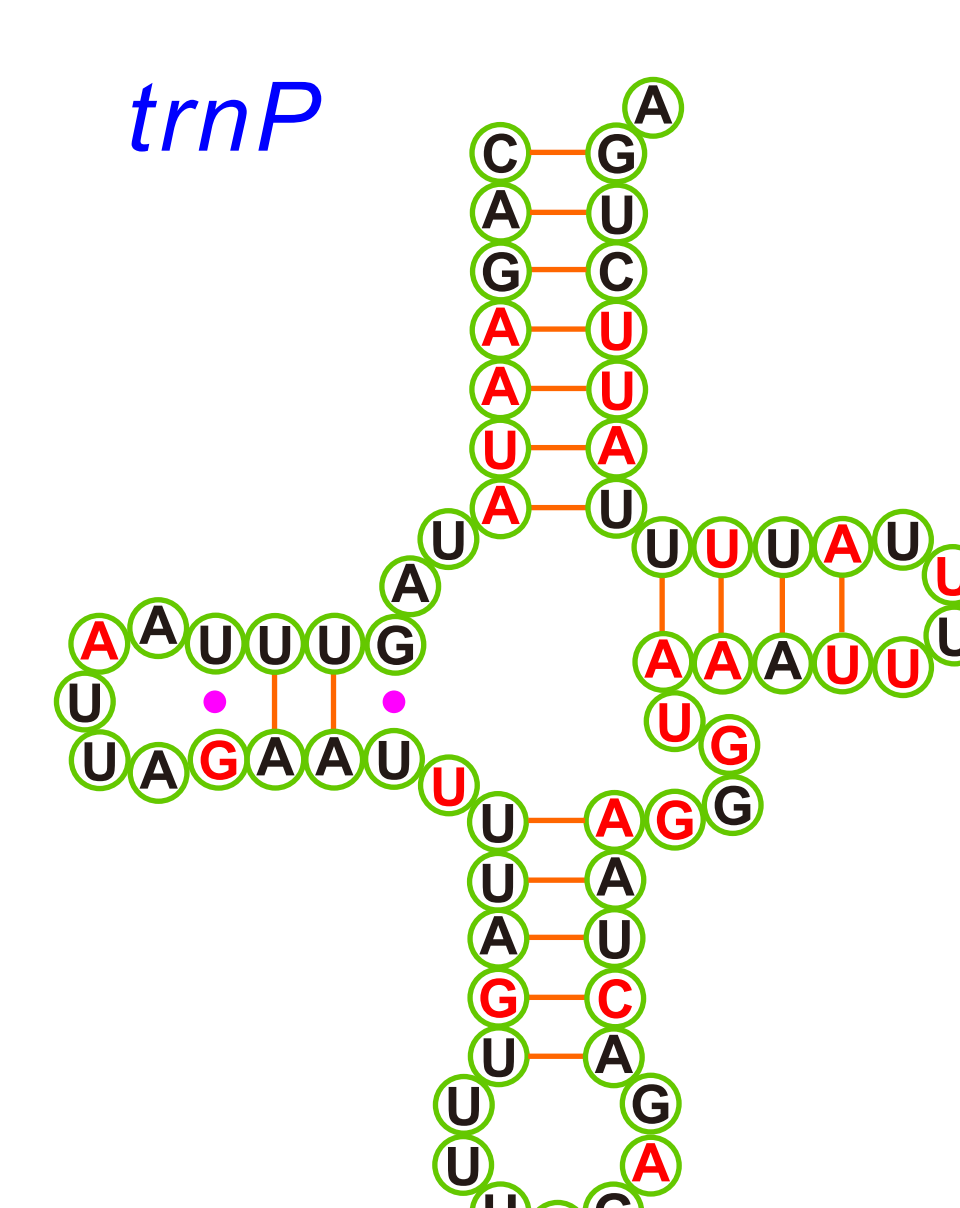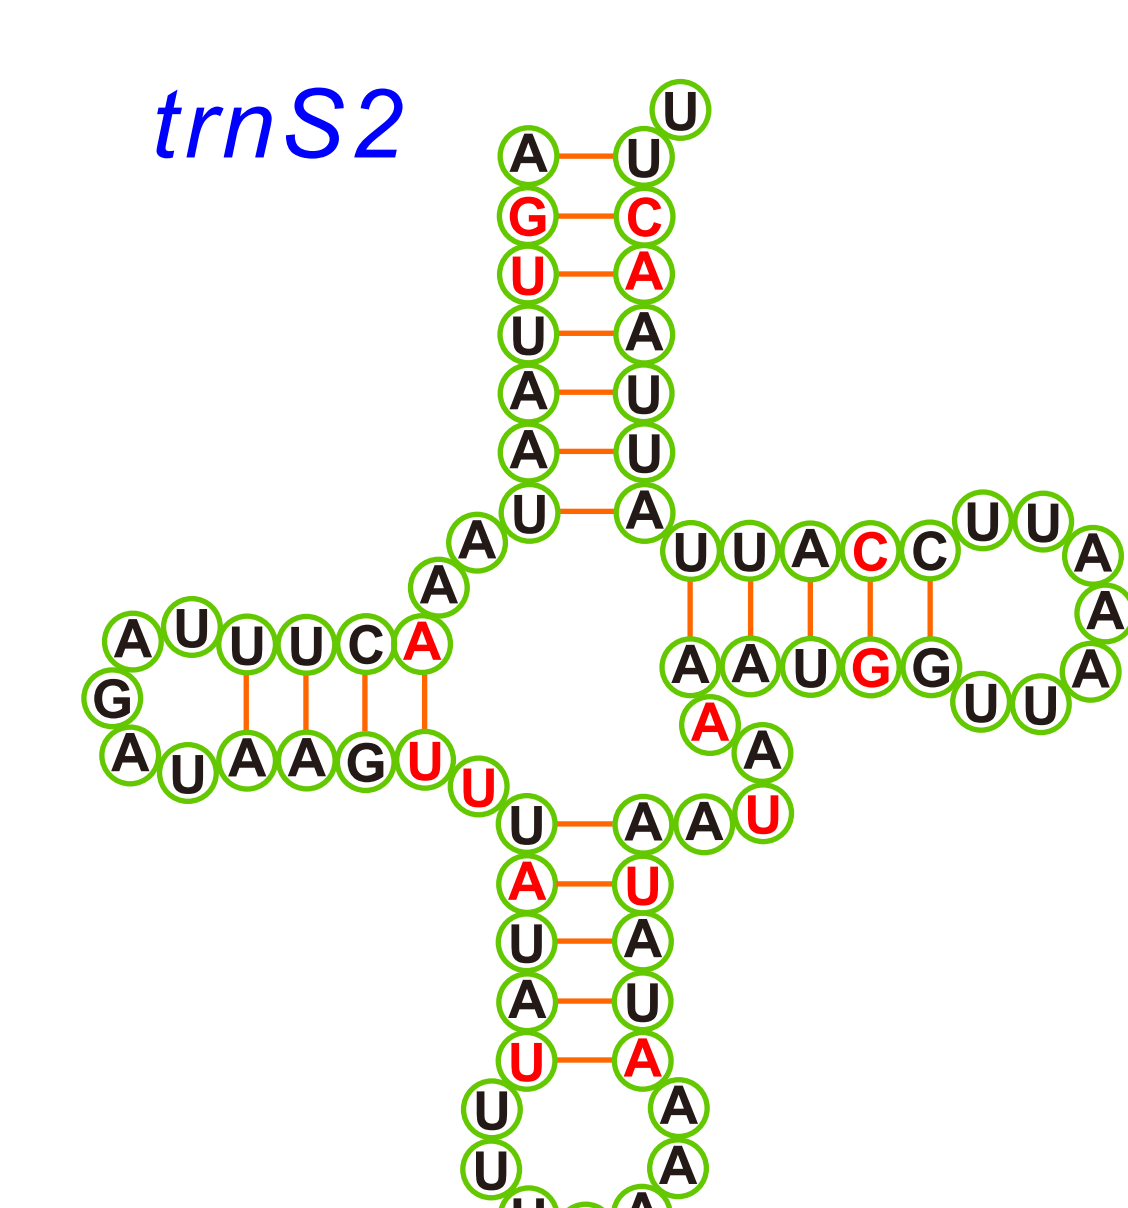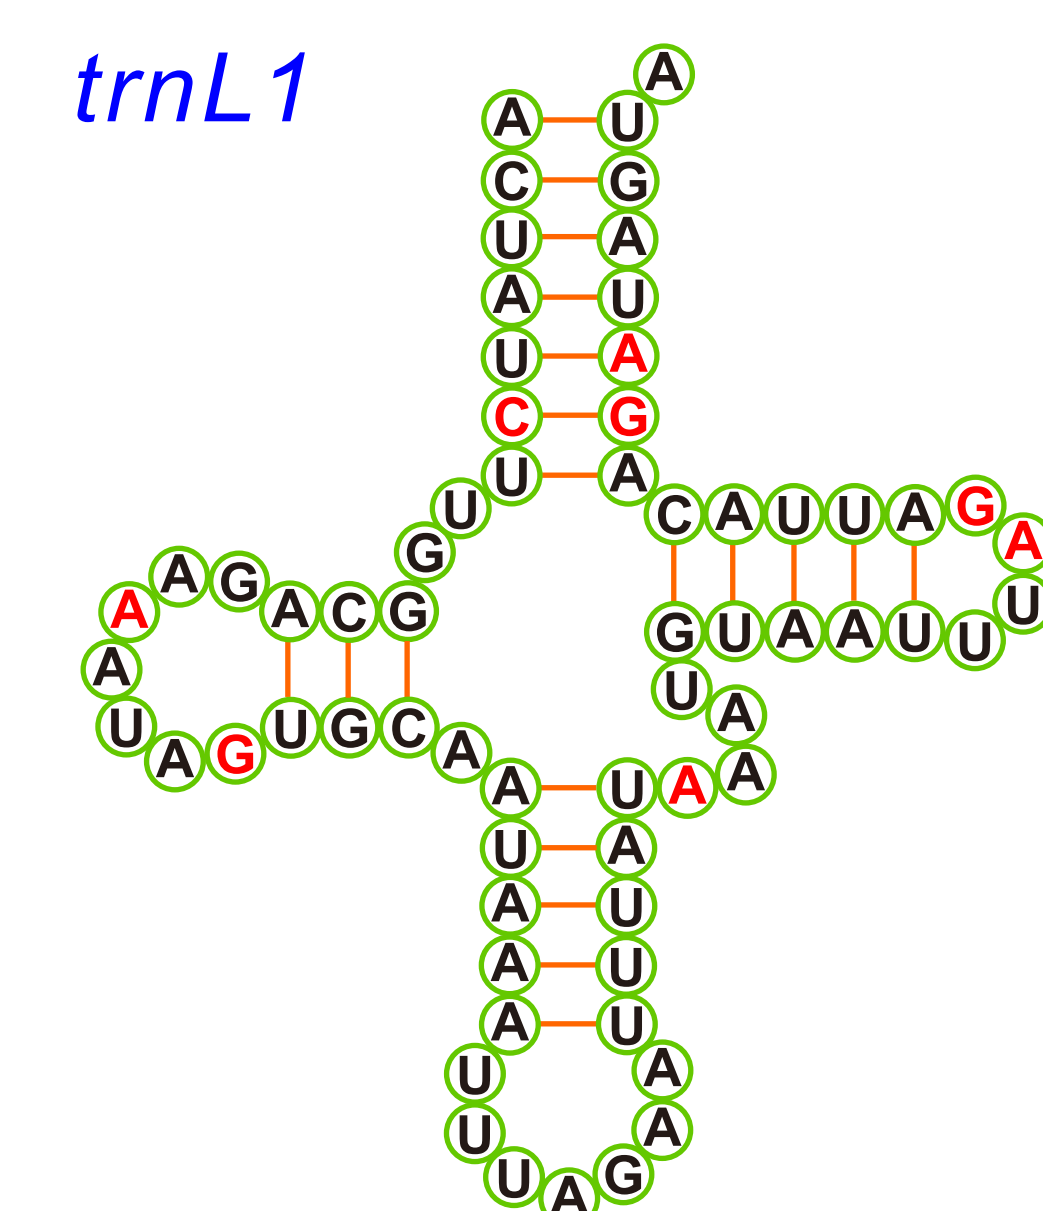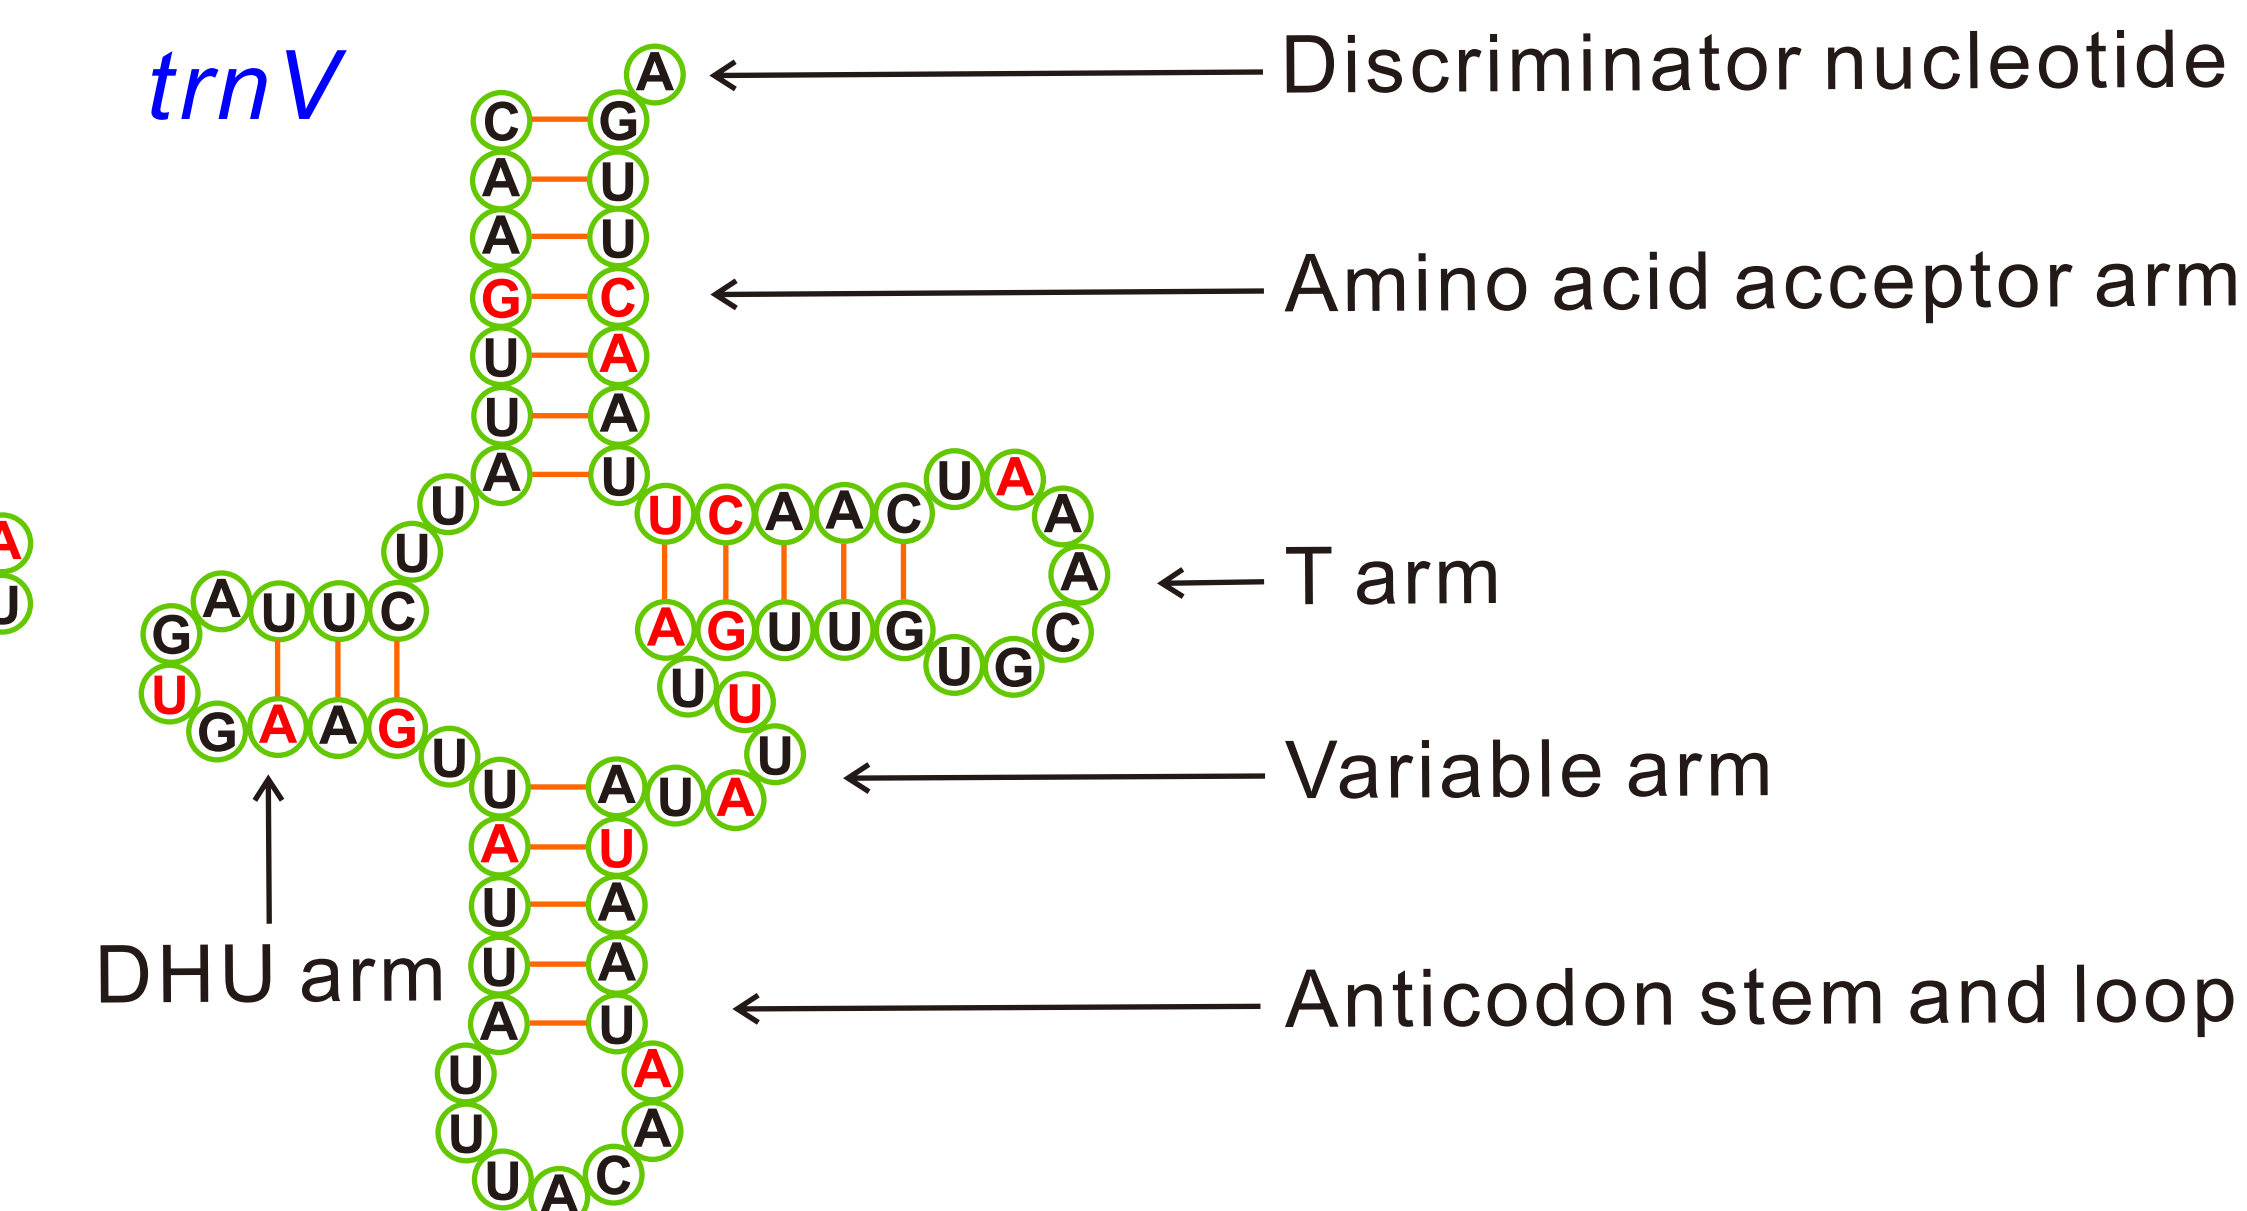

- Discriminator nucleotide

- Amino acid acceptor arm

- T arm

- Variable arm

- Anticodon stem and loop

DHU arm
