# Supplementary figures and images for: The Complete Mitogenome of Pyrrhocoris tibialis (Hemiptera: Pyrrhocoridae) and Phylogenetic Implications
Source: MDPI journal article supplement (doi:10.3390/genes10100820), 2019-10-18

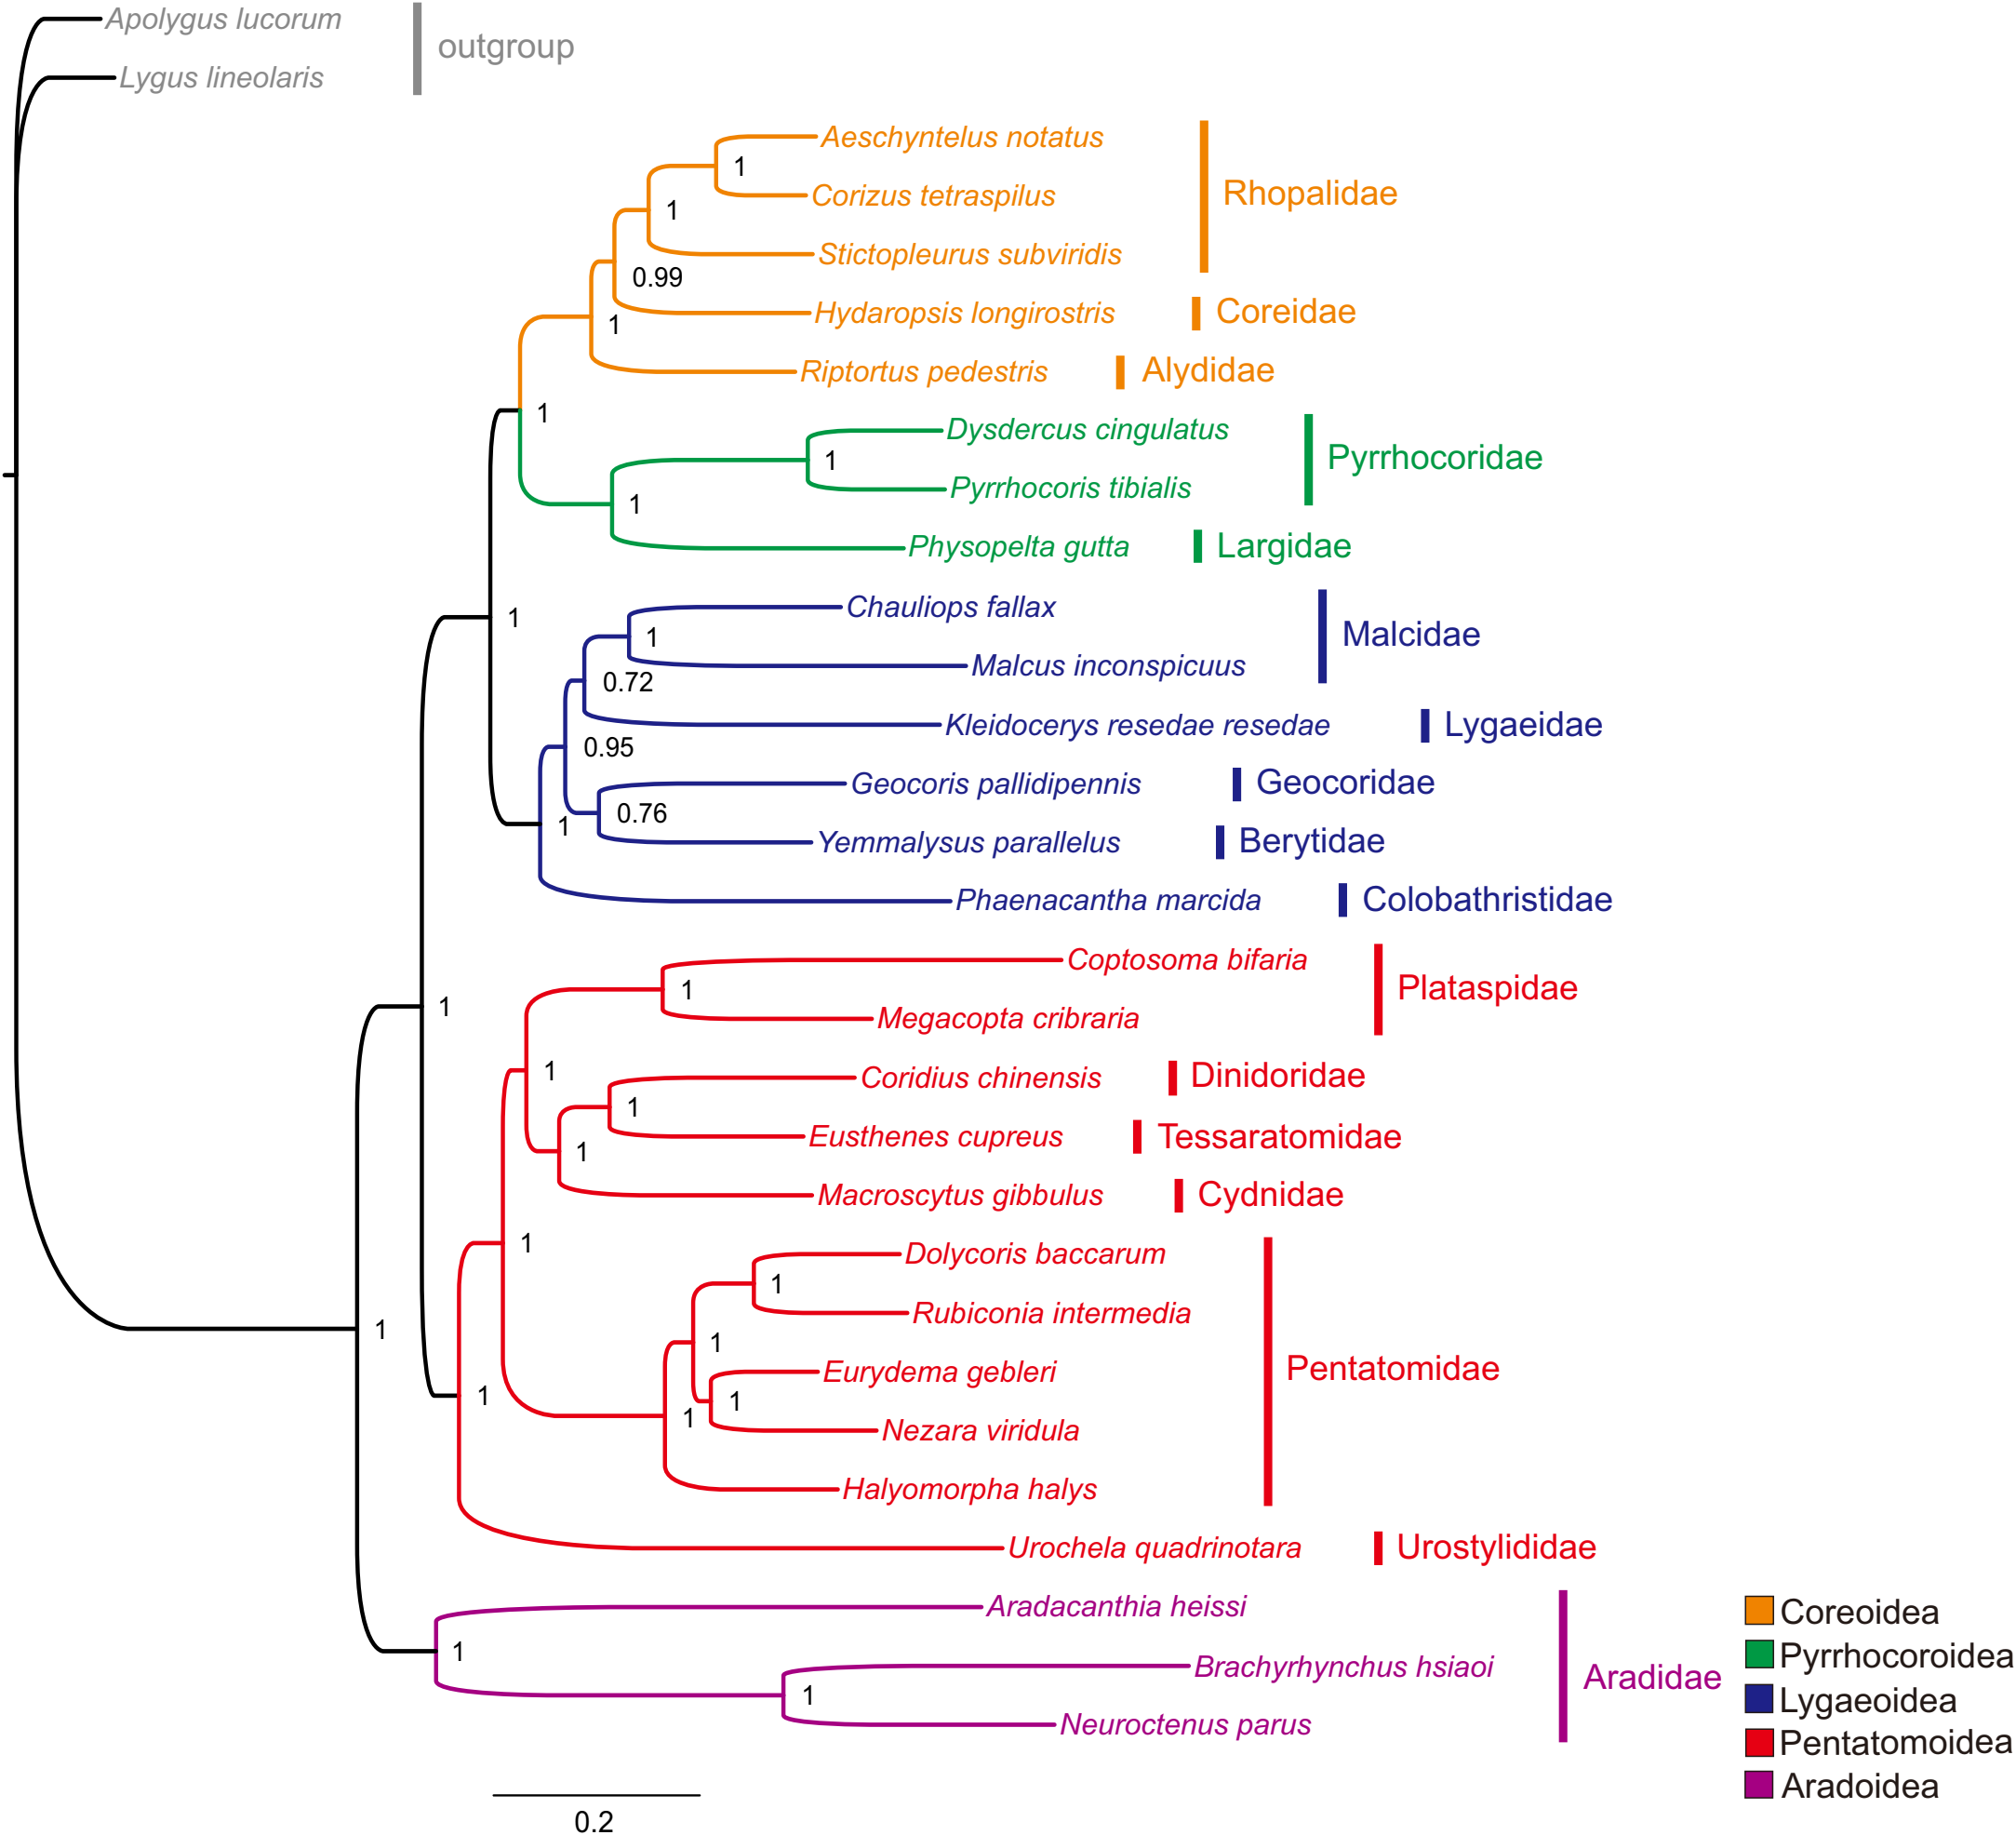

Supplement: s1 [file s1]

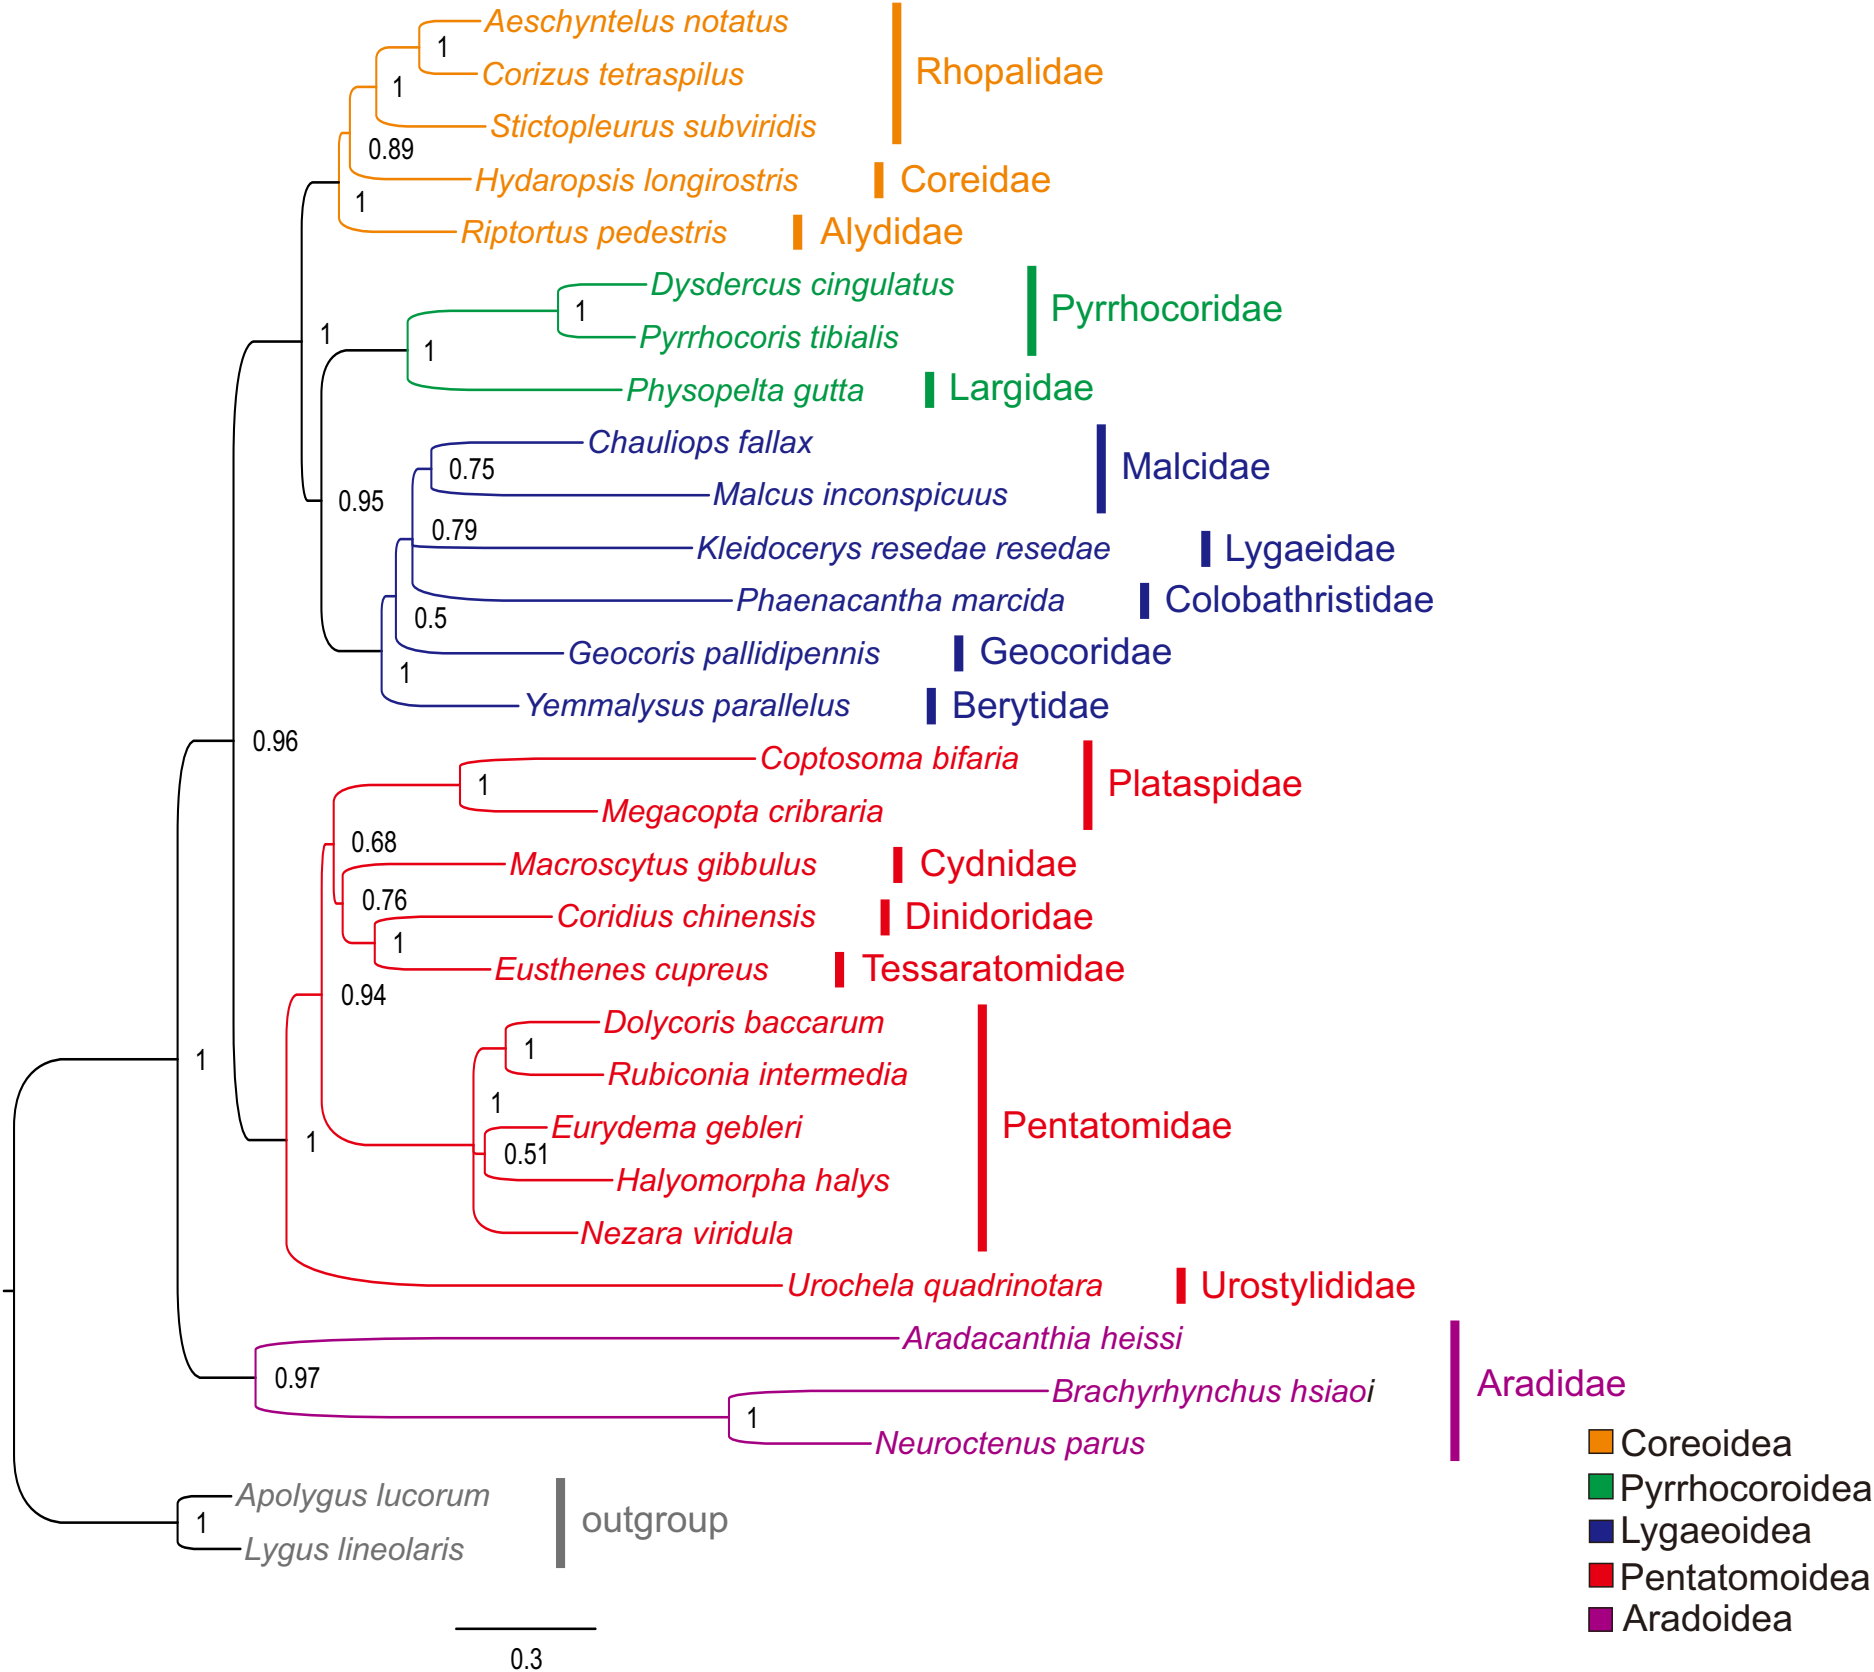

Supplement: s1 [file s1]

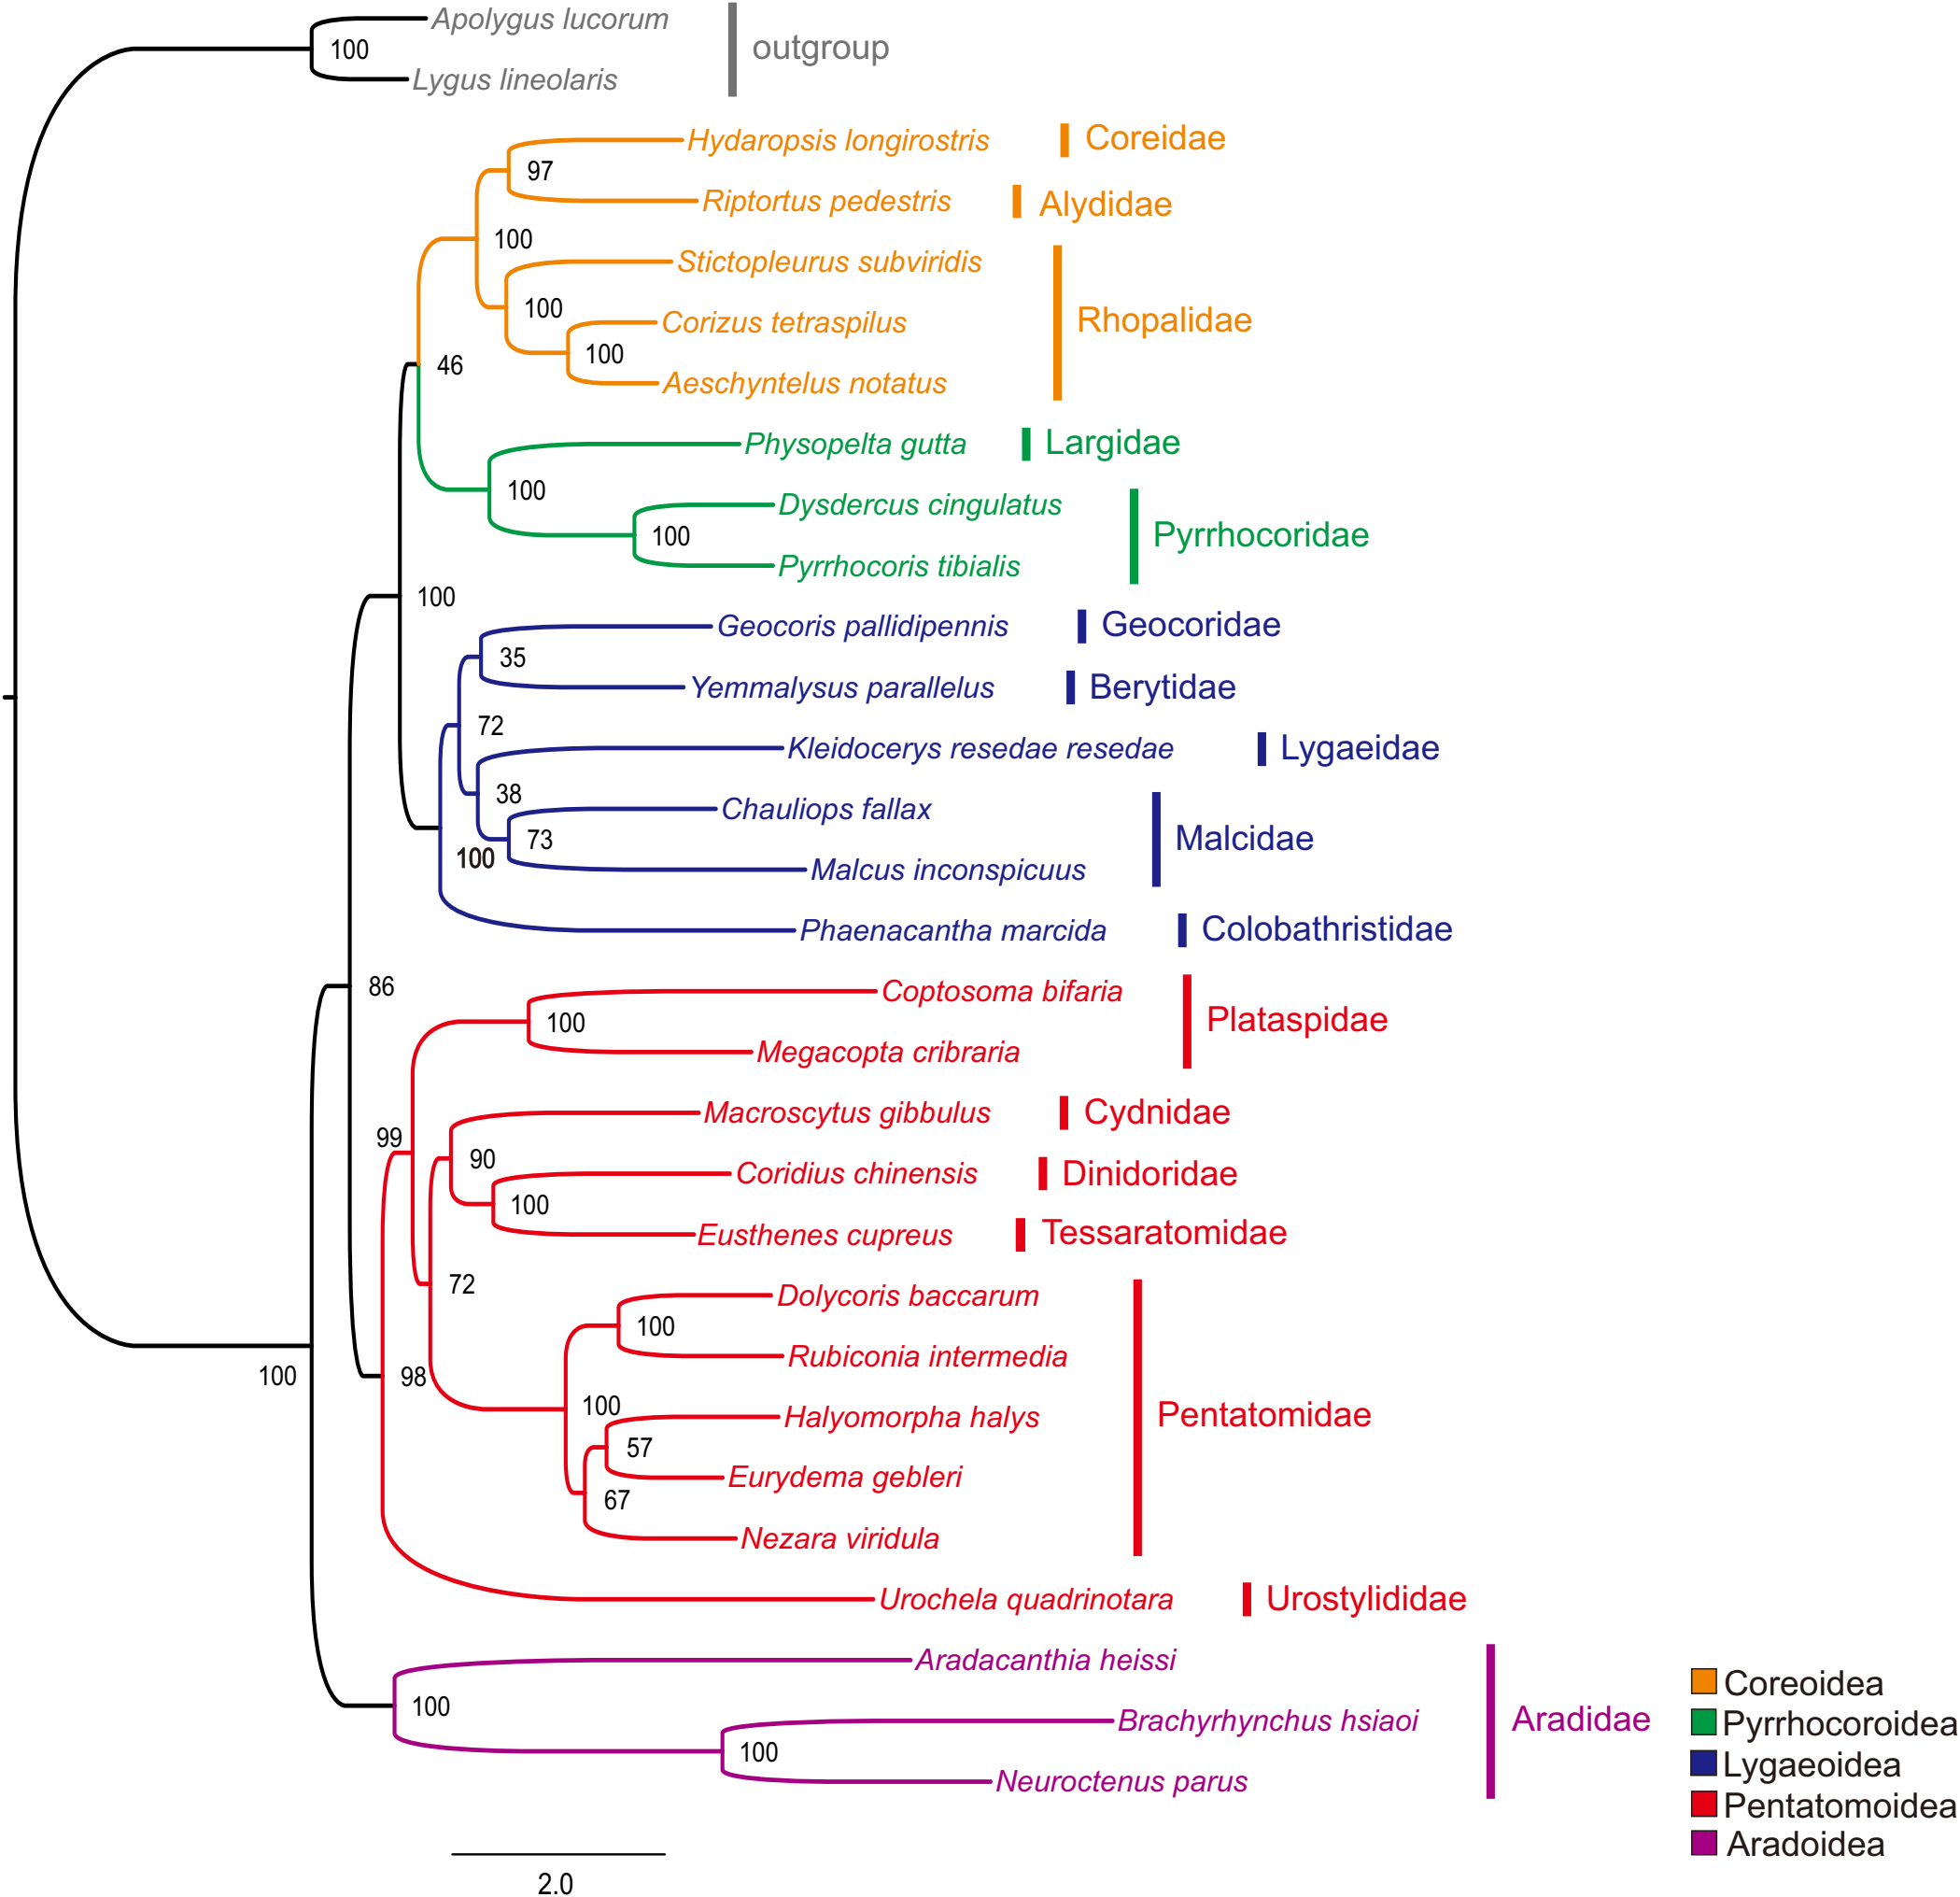

Supplement: s1 [file s1]

A

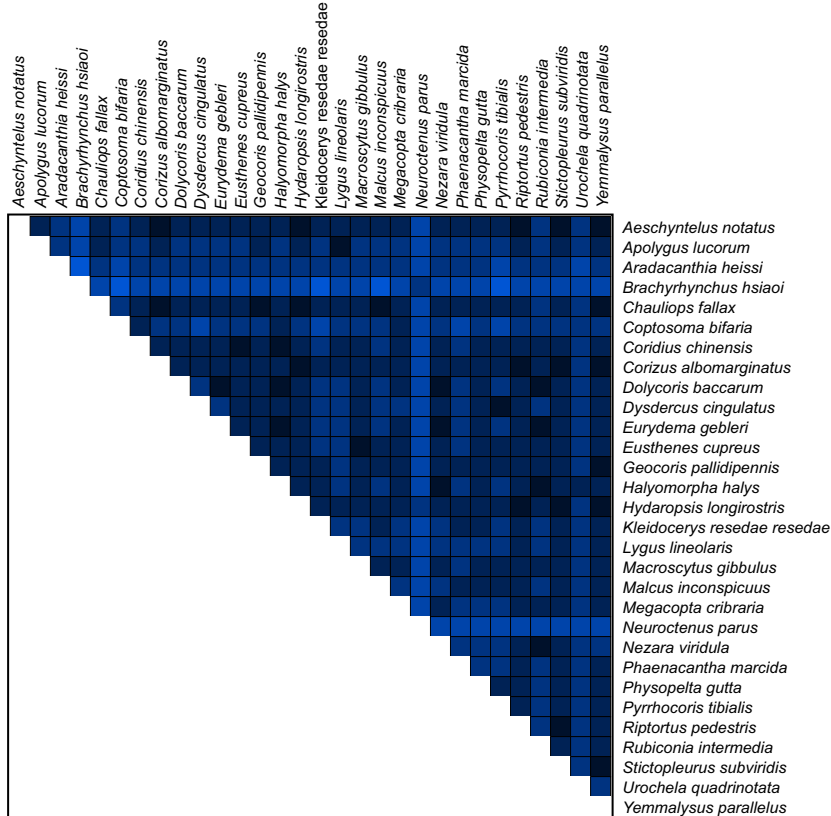

B

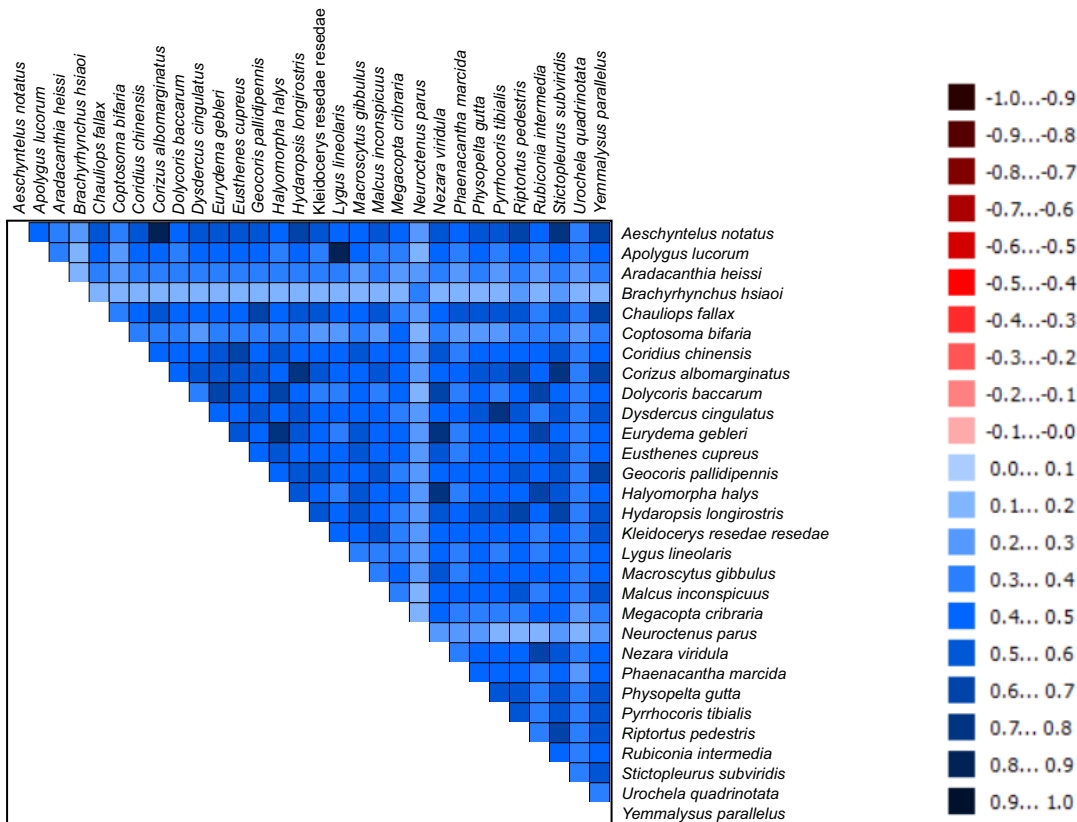

Supplement: s1 [file s1]

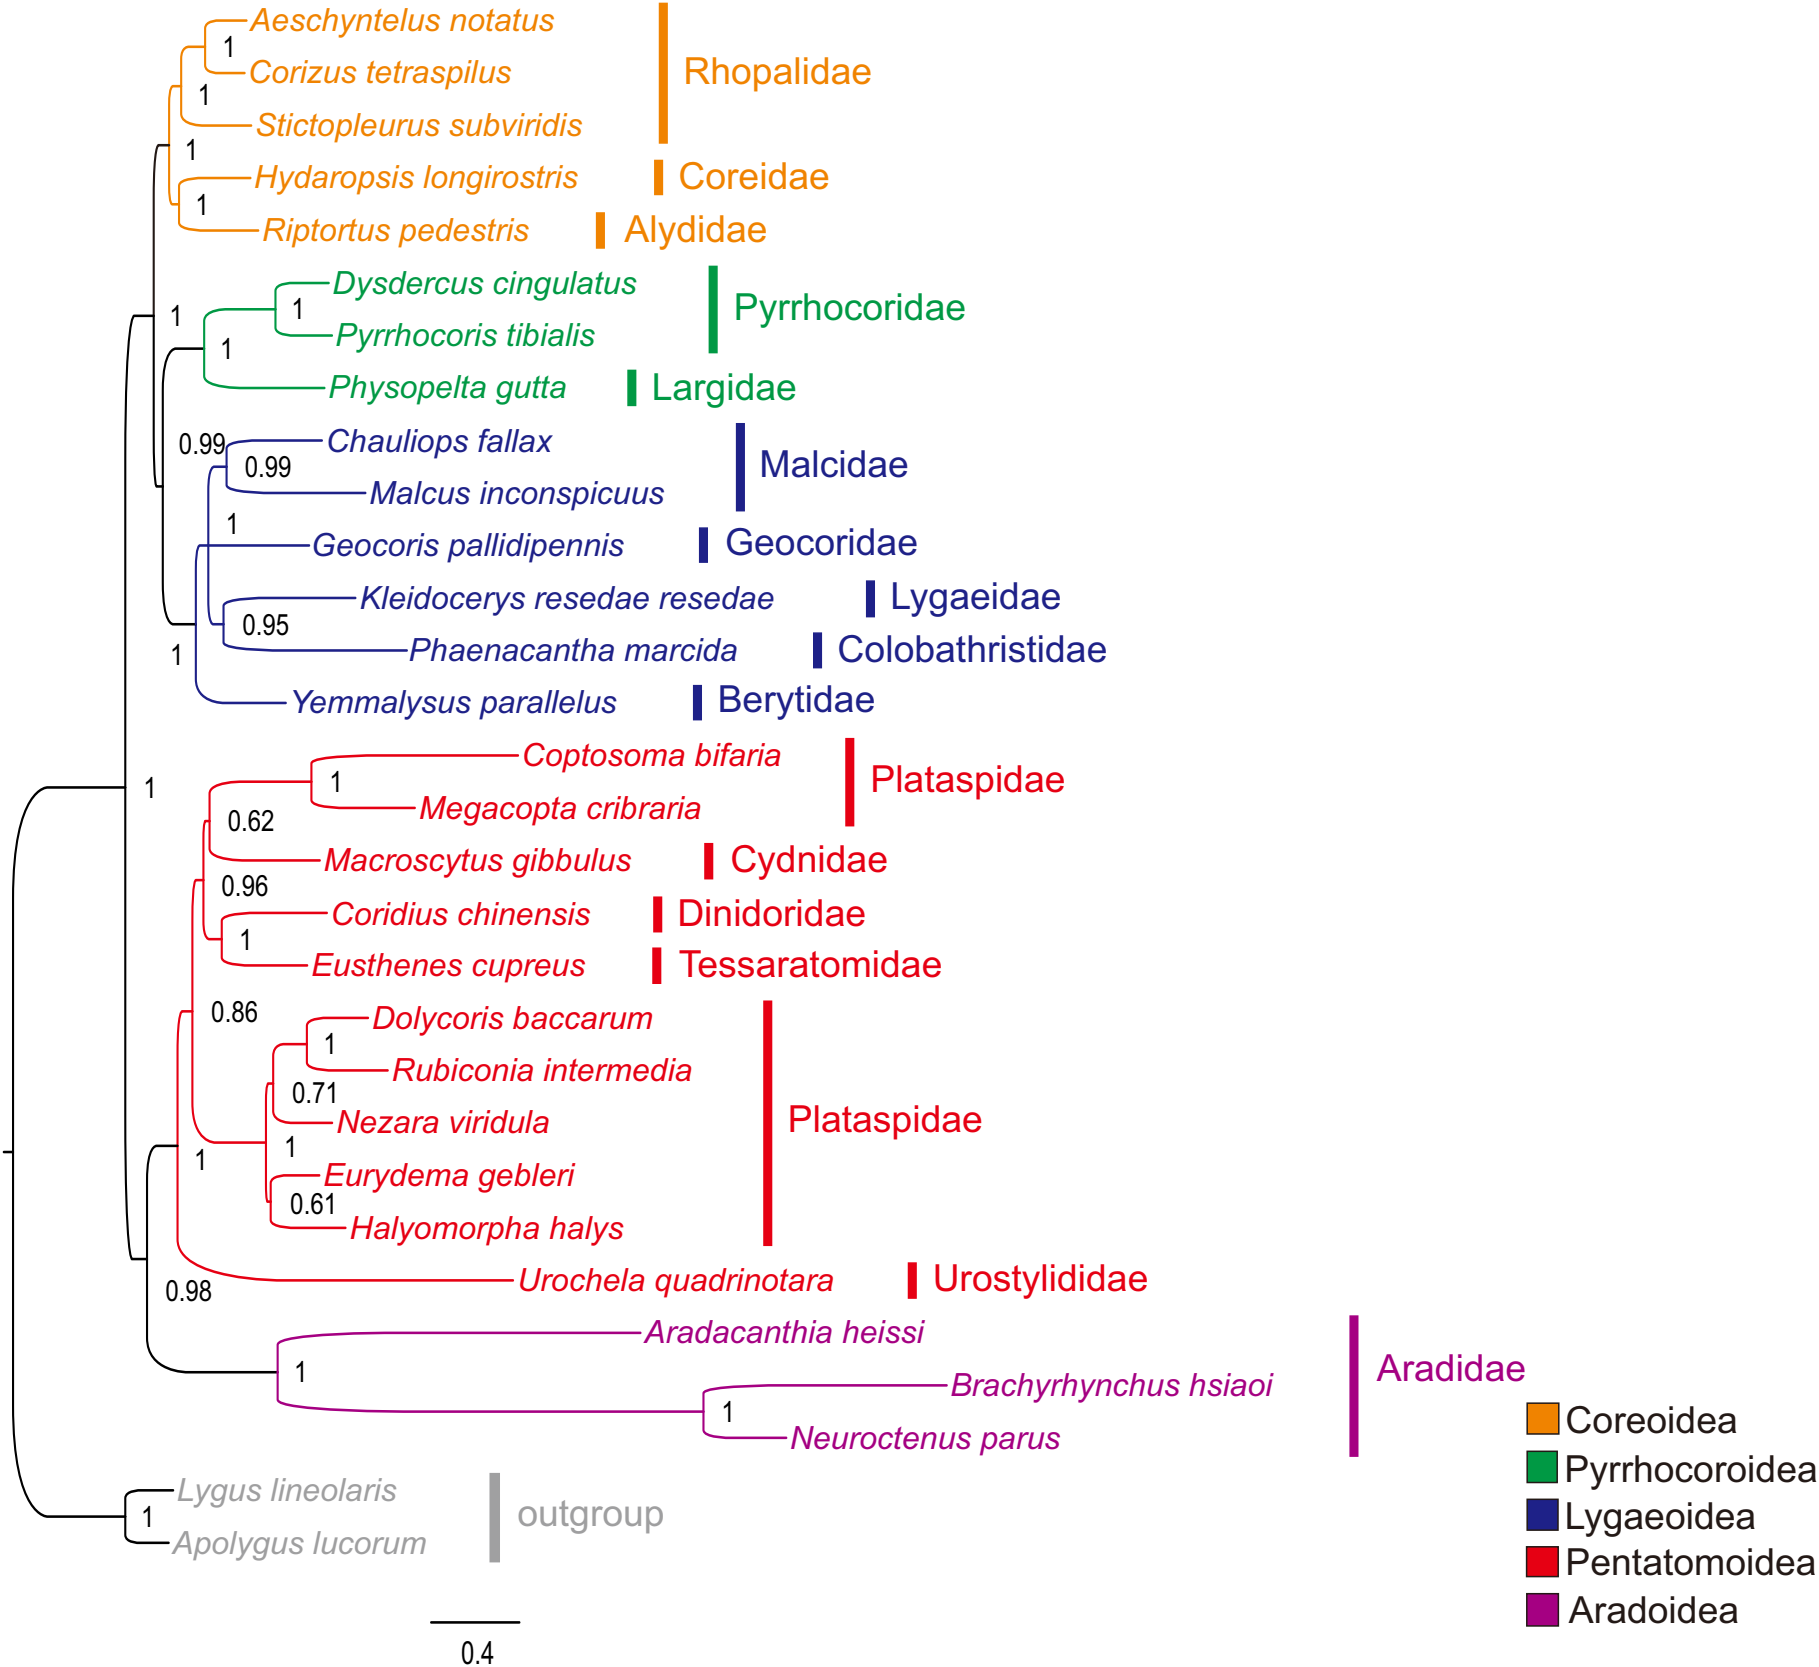

Supplement: s1 [file s1]

***P. tibialis***

1,620 bp

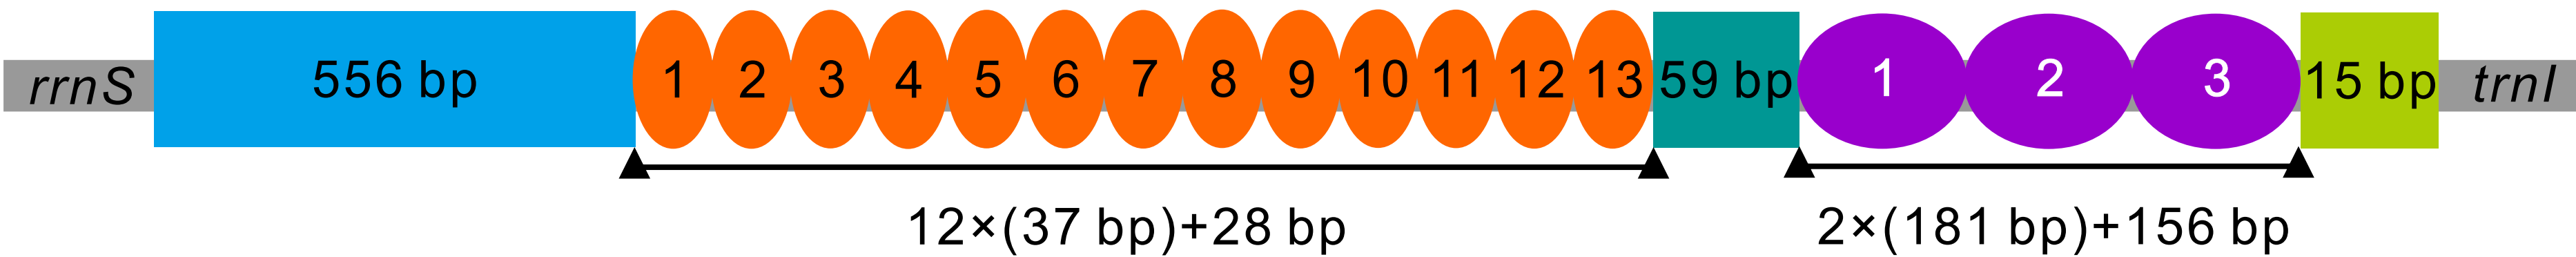

***D. cingulatus***

1,617 bp

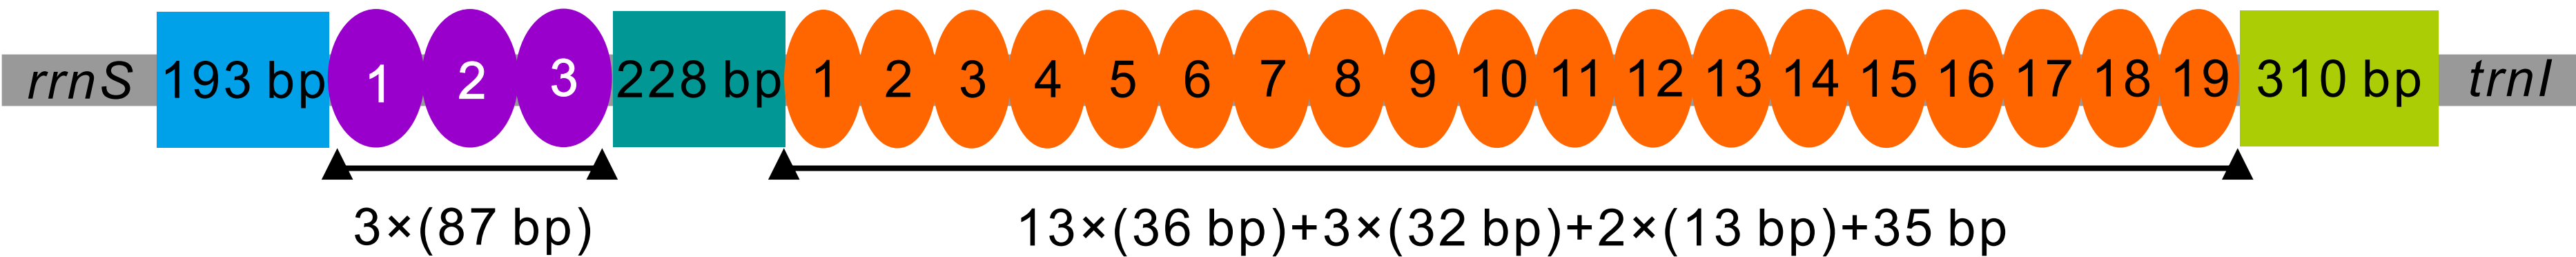

***P. gutta***

224 bp

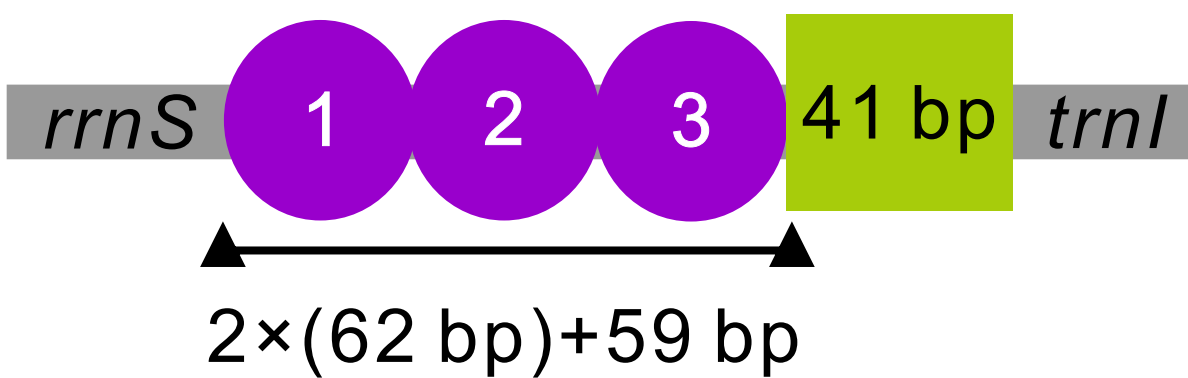

Supplement: s1 [file s1]

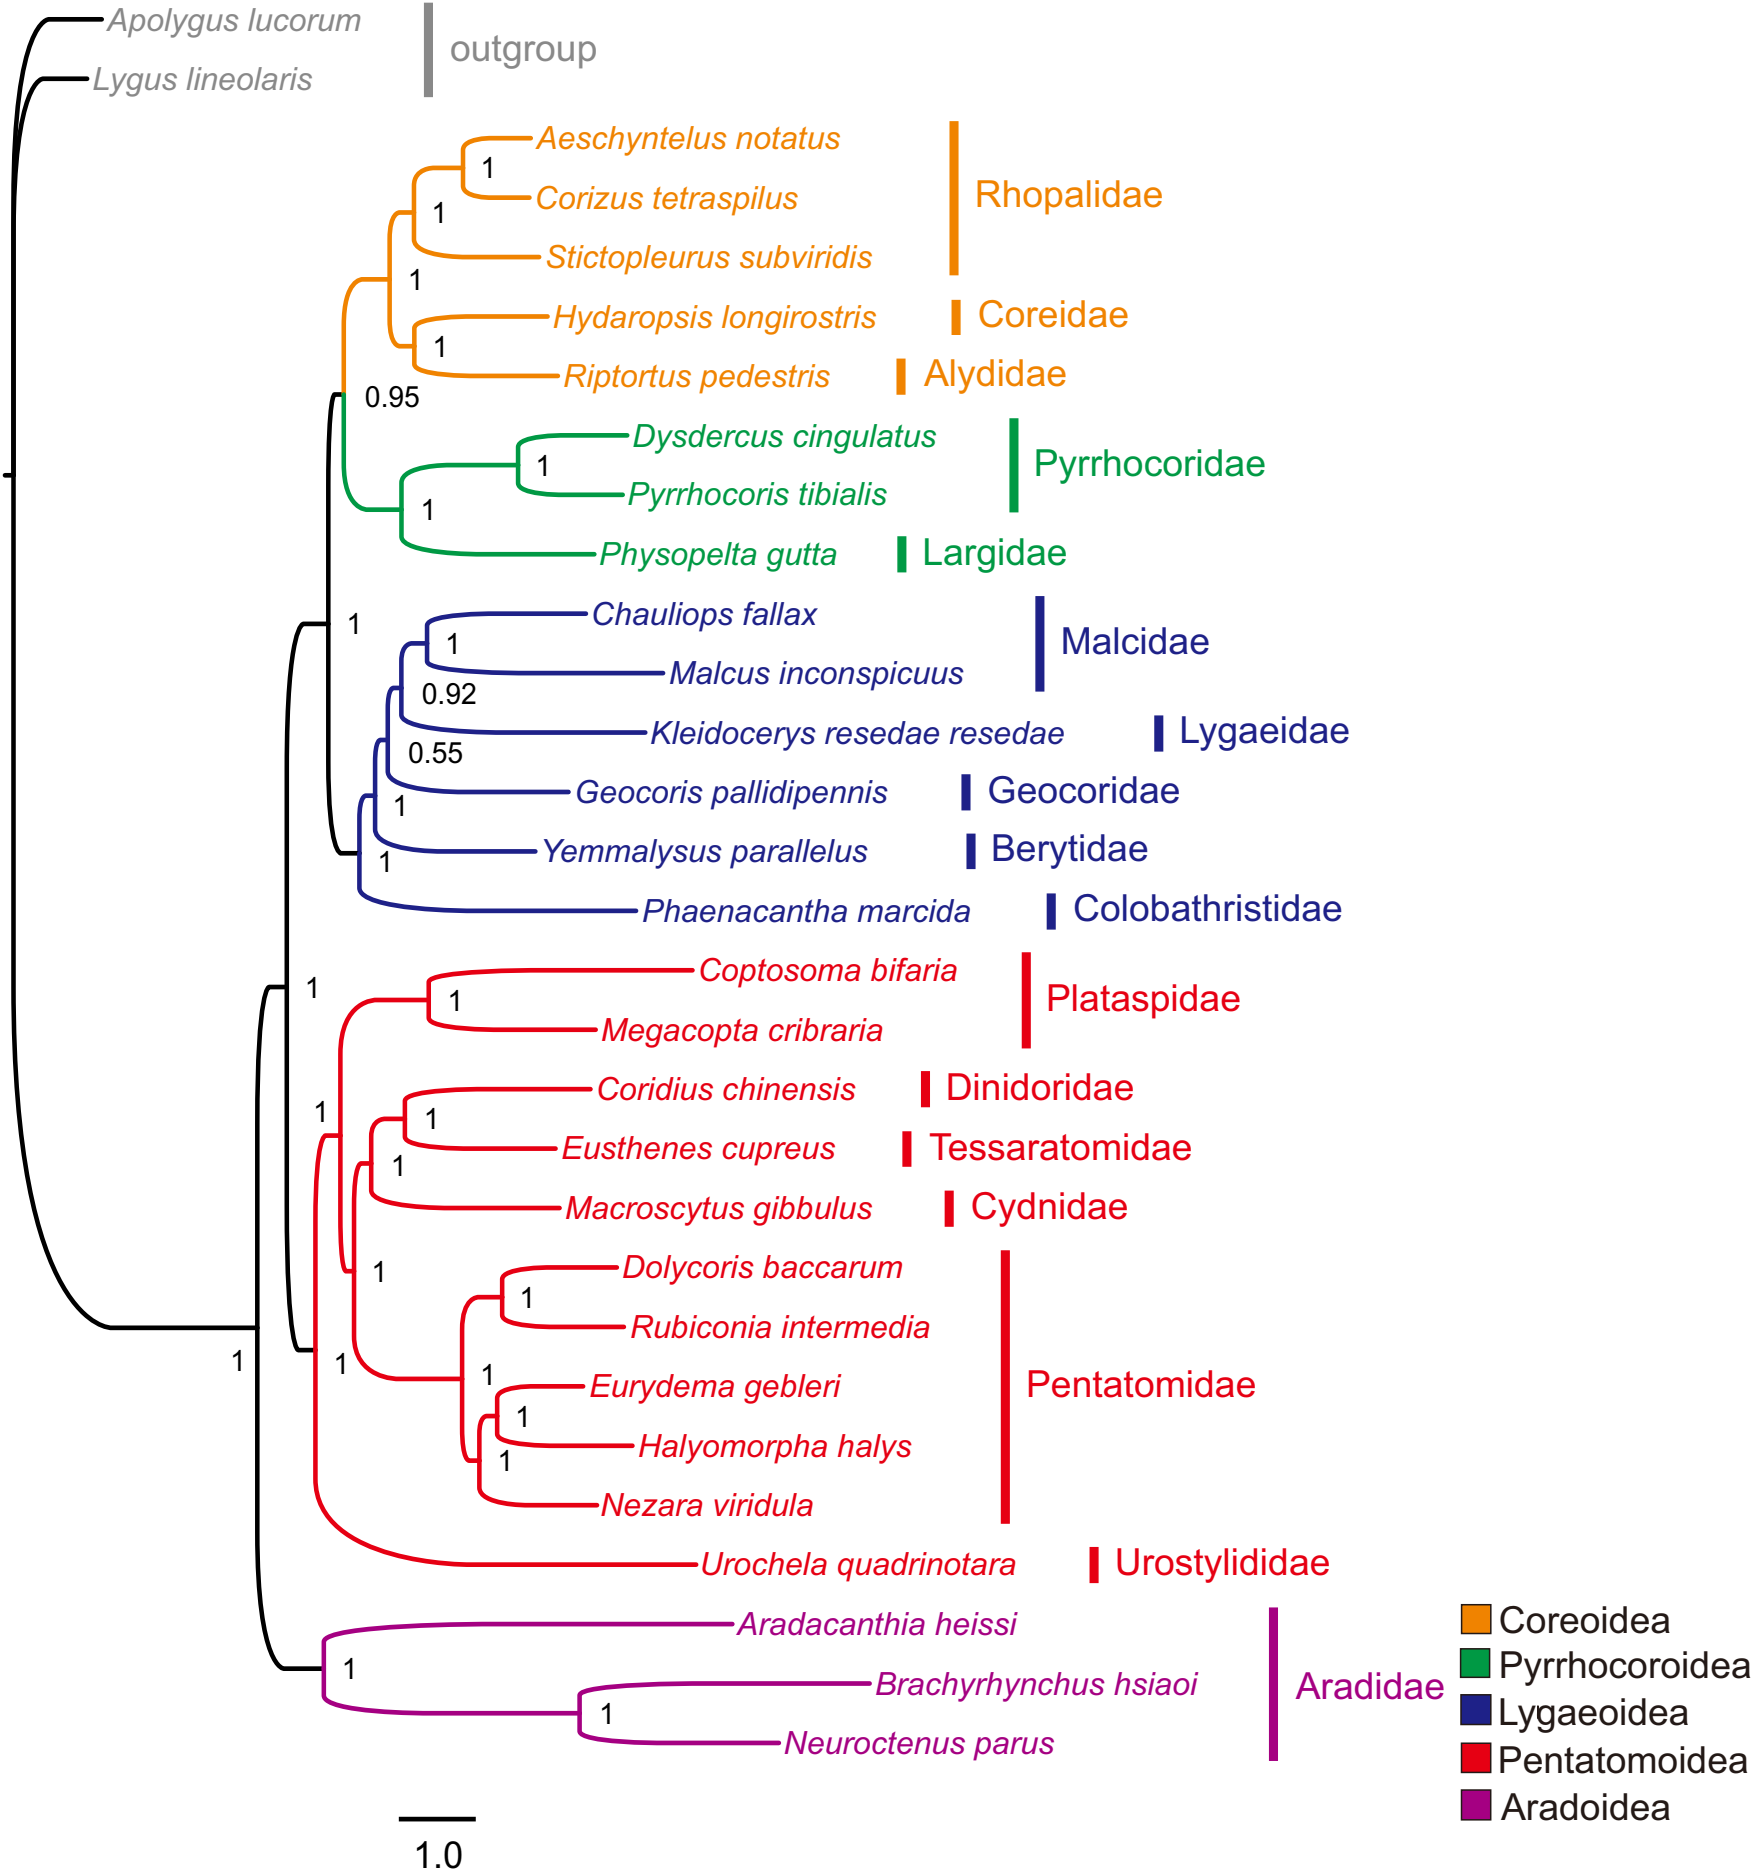

Supplement: s1 [file s1]

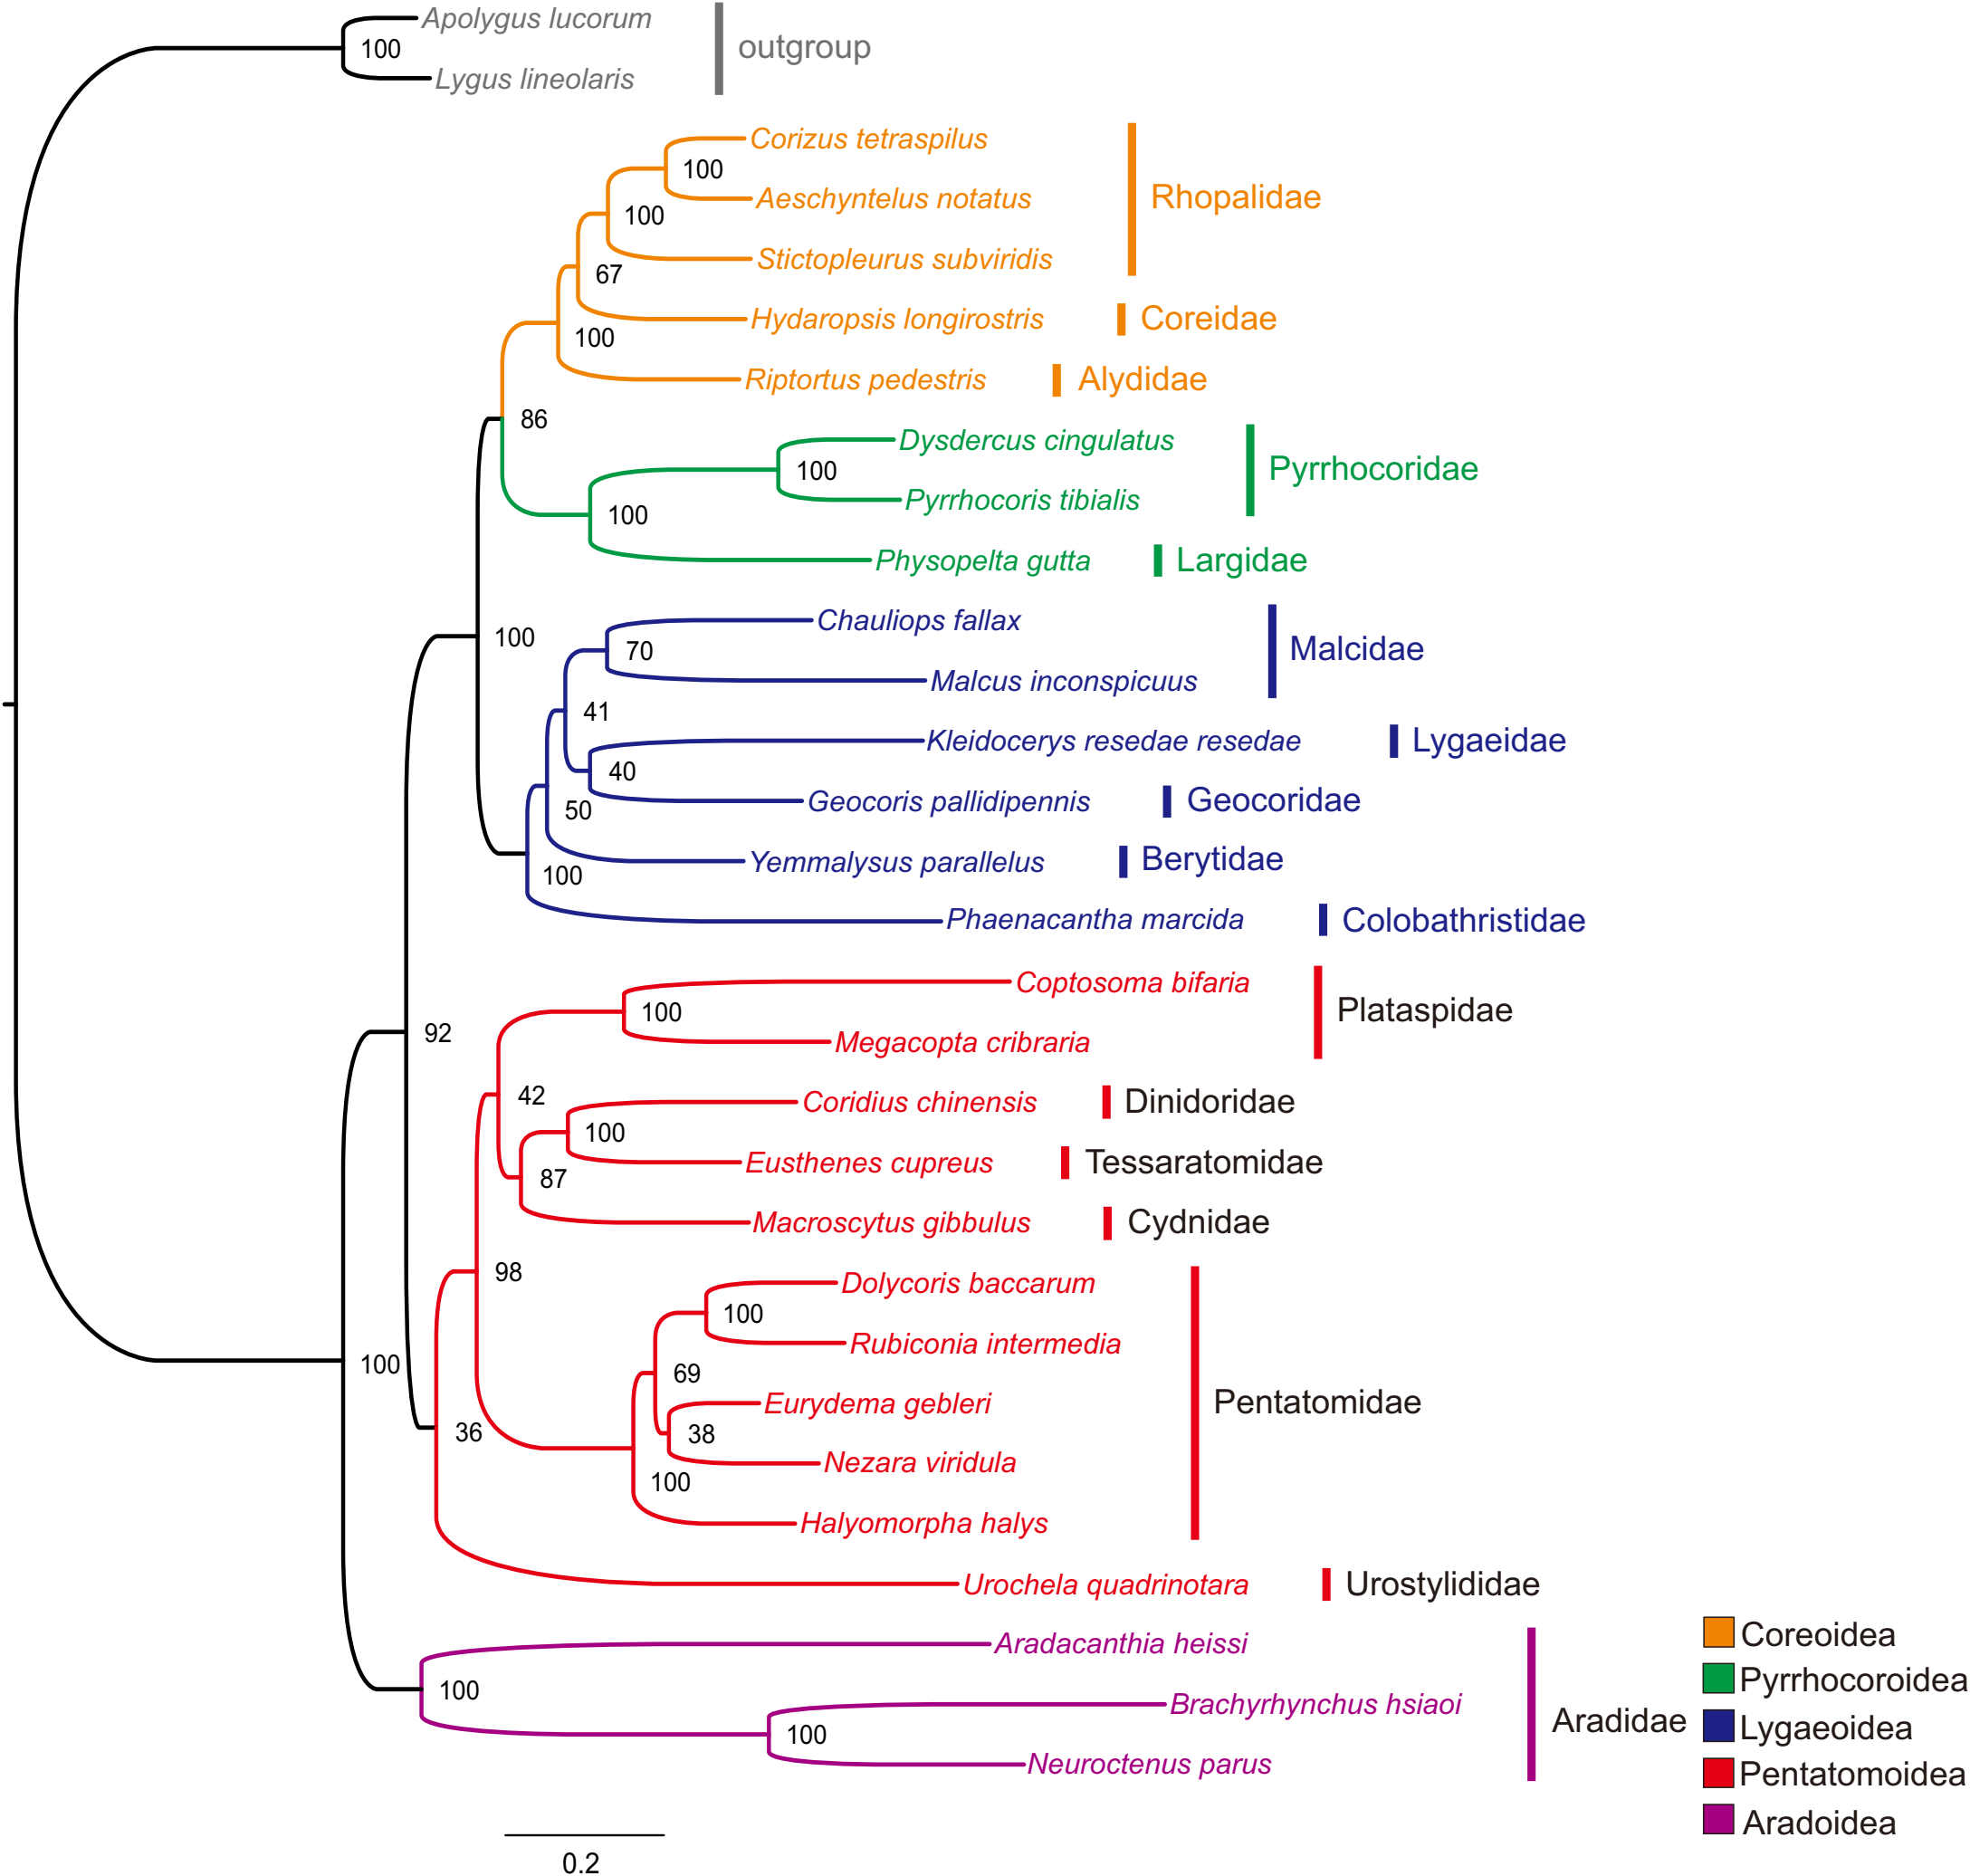

Supplement: s1 [file s1]
